# Supplementary material for: Effects of pH and light exposure on the survival of bacteria and their ability to biodegrade organic compounds in clouds: implications for microbial activity in acidic cloud water
Source: Copernicus journal article supplement (doi:10.5194/acp-23-1731-2023), 2023-01-31
Supplement: Supplementary file 1 [file acp-23-1731-2023-supplement.pdf]

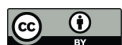

*Supplement of*

**Effects of pH and light exposure on the survival of bacteria and their ability to biodegrade organic compounds in clouds: implications for microbial activity in acidic cloud water**

Yushuo Liu et al.

*Correspondence to:* Theodora Nah ([theodora.nah@cityu.edu.hk](mailto:theodora.nah@cityu.edu.hk))

The copyright of individual parts of the supplement might differ from the article licence.

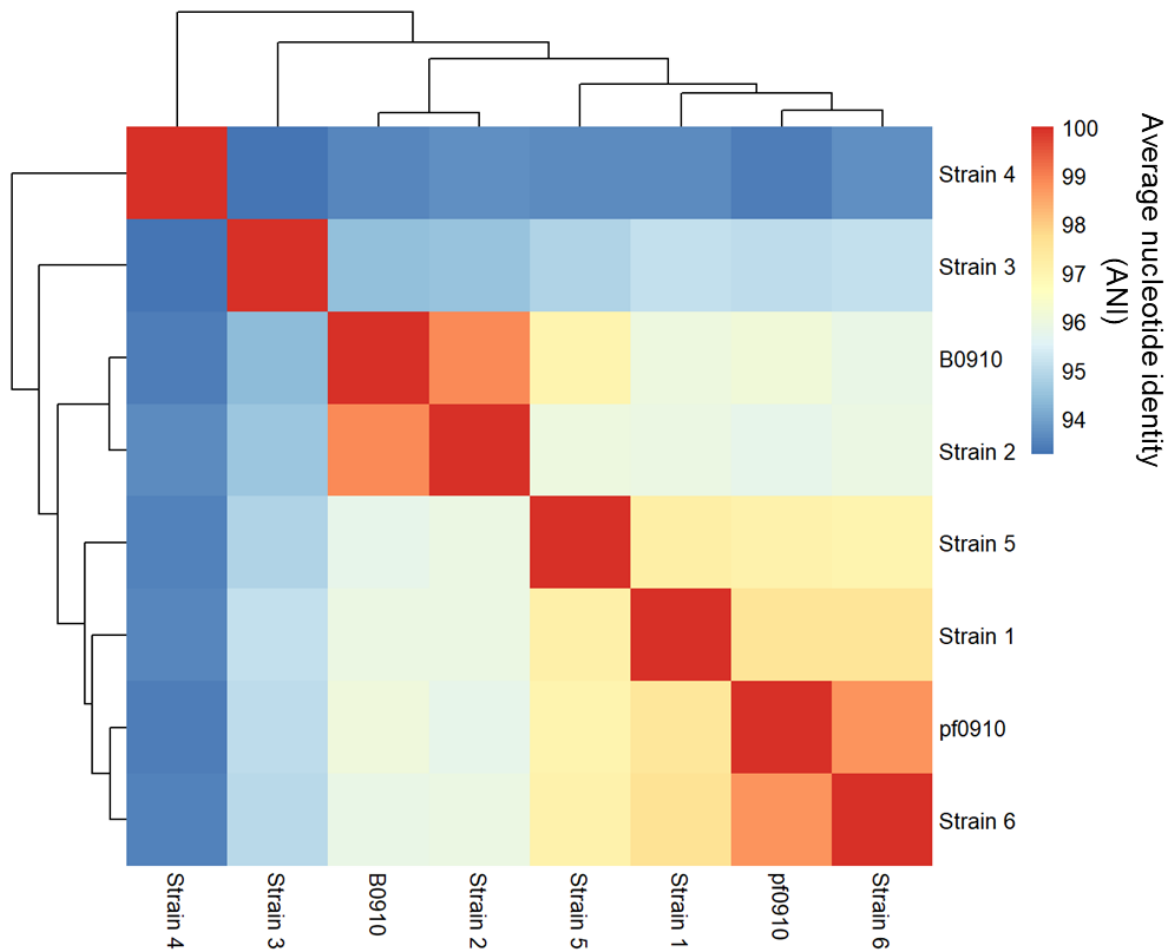

18

19 **Figure S1.** Average nucleotide identity (ANI) value of *Enterobacter* strains B0910, pf0910,  
 20 and six others. **Strain 1:** *Enterobacter hormaechei* subsp. *oharae* DSM 16687; **Strain 2:**  
 21 *Enterobacter hormaechei* subsp. *hoffmannii* DSM 14563; **Strain 3:** *Enterobacter hormaechei*  
 22 ATCC 49162; **Strain 4:** *Enterobacter quasihormaechei*. GCF 004331385.1; **Strain 5:**  
 23 *Enterobacter xiangfangensis* LMG27195; **Strain 6:** *Enterobacter hormaechei* subsp.  
 24 *steigerwaltii* DSM 16691. Strains 1 to 6 are the closest identified neighbors with strains B0910  
 25 and pf0910.

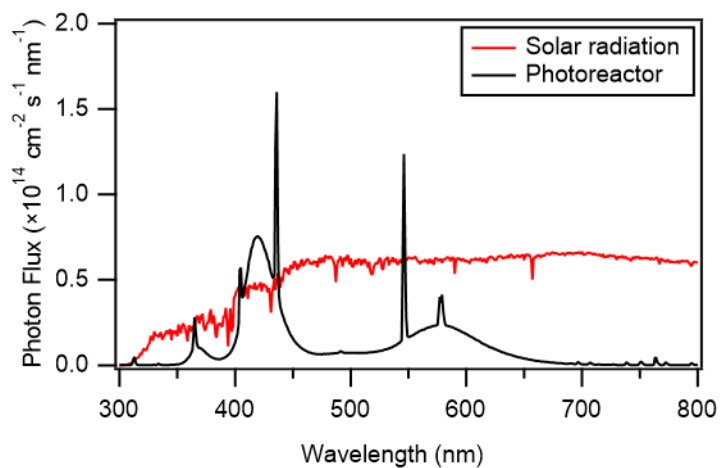

26

27 **Figure S2.** Photon flux inside of the photoreactor (black) and actinic flux for a fall day in Hong  
28 Kong in the morning (red). One lamp with output centered at  $\sim 365$  nm (RPR-3500A, Southern  
29 New England Ultraviolet Company), four lamps with outputs centered at  $\sim 421$  nm (RPR-  
30 4190A, Southern New England Ultraviolet Company), and three lamps with outputs centered  
31 at  $\sim 580$  nm (RPR-5750A, Southern New England Ultraviolet Company) were used to  
32 illuminate solutions in the photoreactor.

33

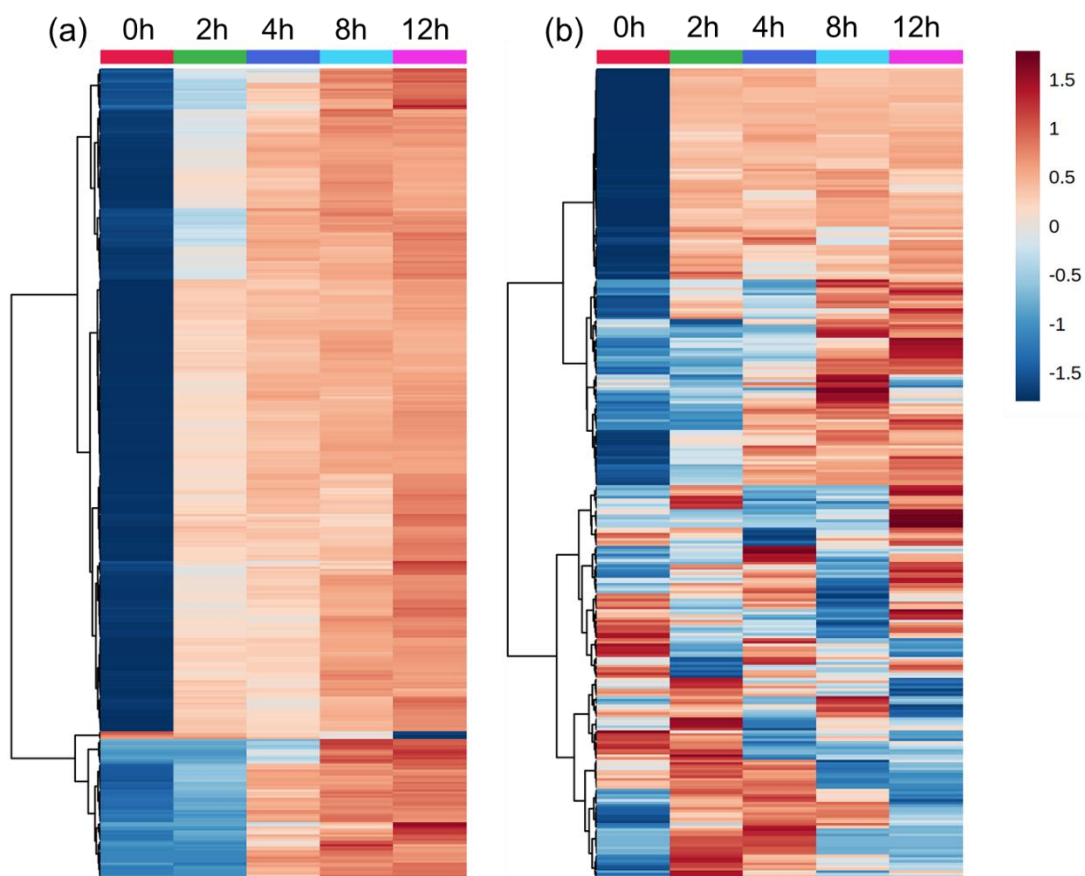

34

35 **Figure S3.** Heat maps showing the time evolution of (a) water-soluble compounds and (b)  
 36 water-insoluble compounds from *E. hormaechei* B0910 during exposure to simulated sunlight  
 37 at pH 4.3. The heat maps were generated from non-targeted UPLC-MS analysis of samples  
 38 with different light exposure times. 259 water-soluble compounds and 215 water-insoluble  
 39 compounds were selected based on PLS-DA results (VIP > 1.0 criteria). The average UPLC-  
 40 MS intensity of each compound at each light exposure time was obtained from the nine  
 41 replicates. The average UPLC-MS intensities were subsequently log<sub>10</sub> transformed and auto  
 42 scaled (i.e., mean-centered and divided by the standard deviation of each variable). The color  
 43 scale ranges from red color for high abundance to blue for low abundance.

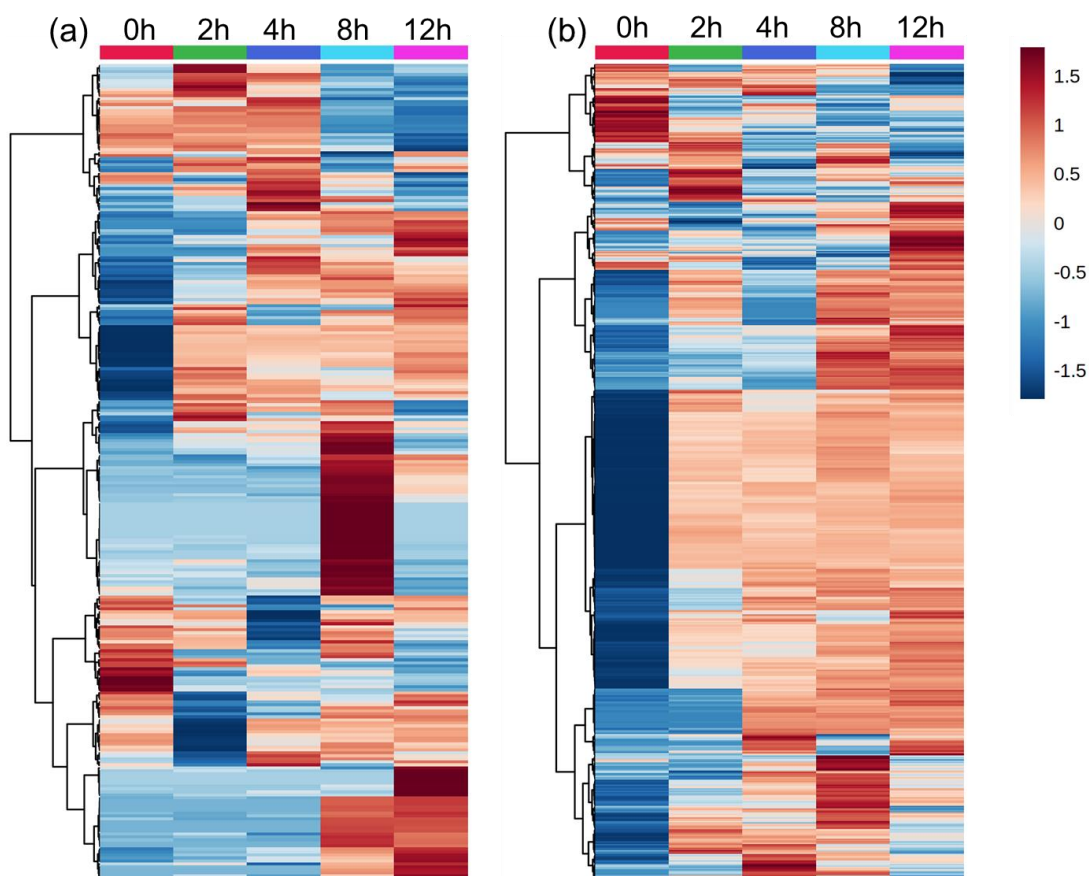

44

45 **Figure S4.** Heat maps showing the time evolution of (a) water-soluble compounds and (b)  
 46 water-insoluble compounds from *E. hormaechei* pf0910 during exposure to simulated sunlight  
 47 at pH 4.3. The heat maps were generated from non-targeted UPLC-MS analysis of samples  
 48 with different light exposure times. 209 water-soluble compounds and 251 water-insoluble  
 49 compounds were selected based on PLS-DA results (VIP > 1.0 criteria). The average UPLC-  
 50 MS intensity of each compound at each light exposure time was obtained from the nine  
 51 replicates. The average UPLC-MS intensities were subsequently log<sub>10</sub> transformed and auto  
 52 scaled (i.e., mean-centered and divided by the standard deviation of each variable). The color  
 53 scale ranges from red color for high abundance to blue for low abundance.

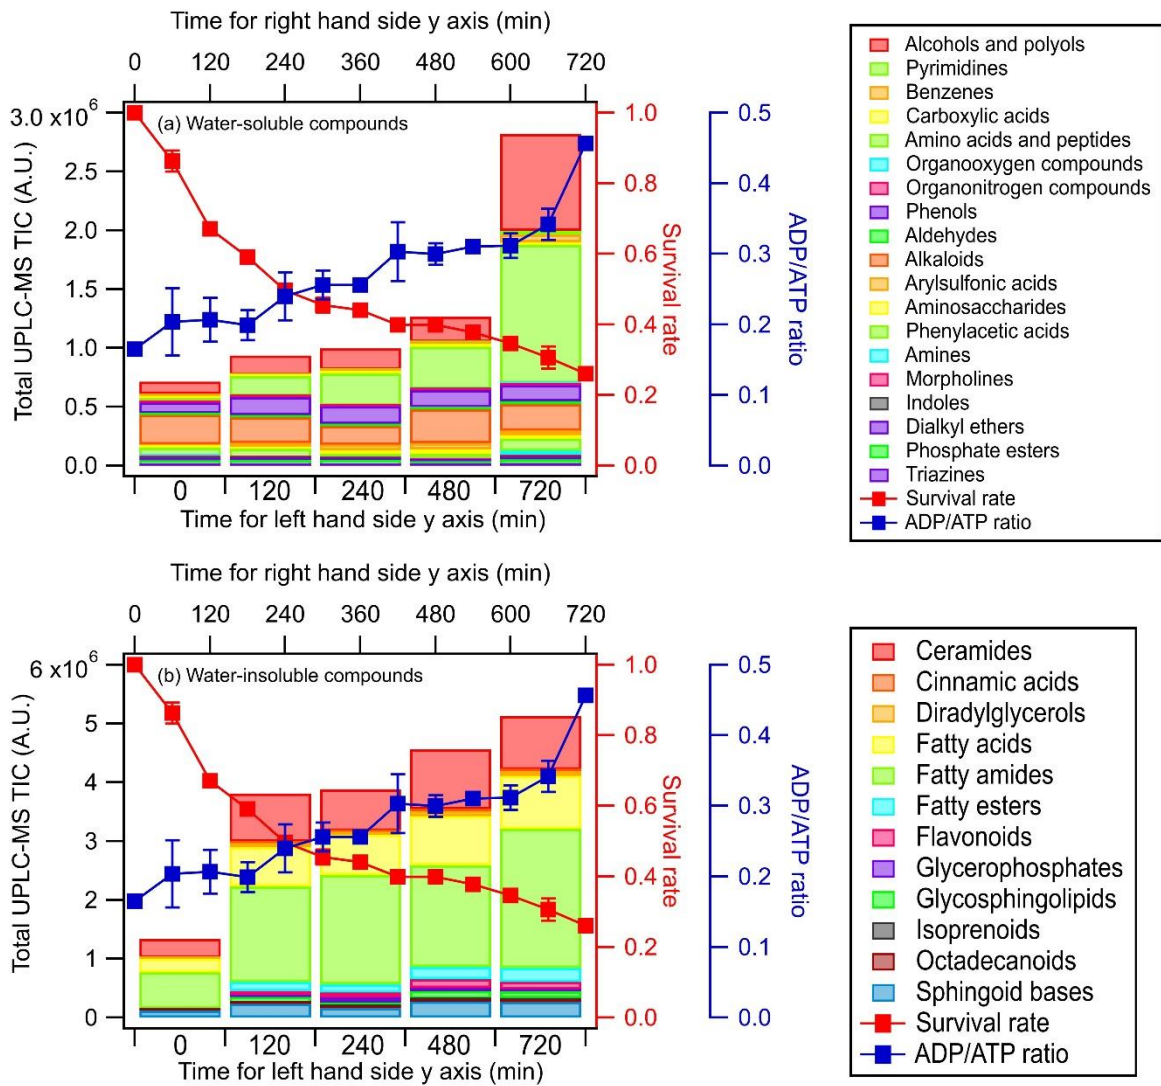

54

55 **Figure S5.** Time evolution of the UPLC-MS total ion chromatograph (TIC) signals of (a)  
 56 water-soluble compounds, and (b) water-insoluble compounds from *E. hormaechei* pf0910  
 57 during exposure to simulated sunlight at pH 4.3 over time. These compounds are classified  
 58 based on their chemical functionality. Also shown are the time evolution of the survival rate  
 59 and ADP/ATP ratio of *E. hormaechei* pf0910.

(a) Water-soluble compounds

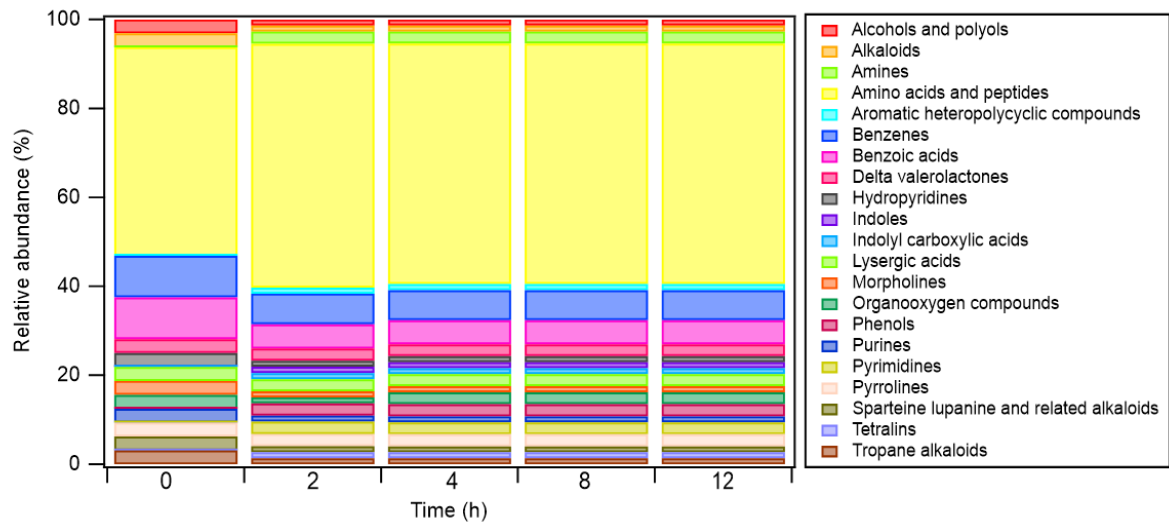

(b) Water-insoluble compounds

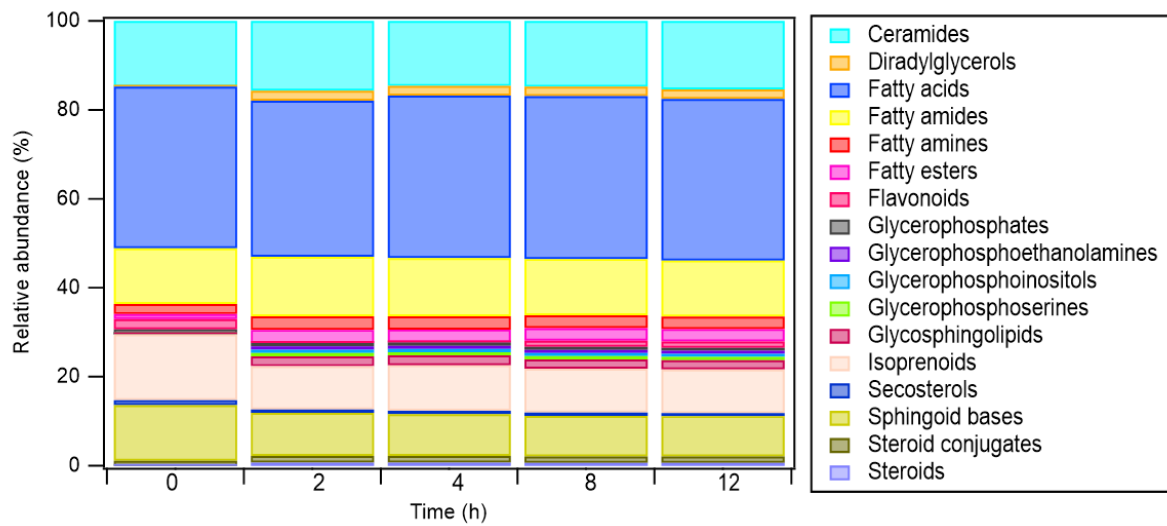

60

61 **Figure S6.** Relative abundance of the different classes of (a) water-soluble compounds, and (b)

62 water-insoluble compounds from *E. hormaechei* B0910 during exposure to simulated sunlight

63 at pH 4.3.

(a) Water-soluble compounds

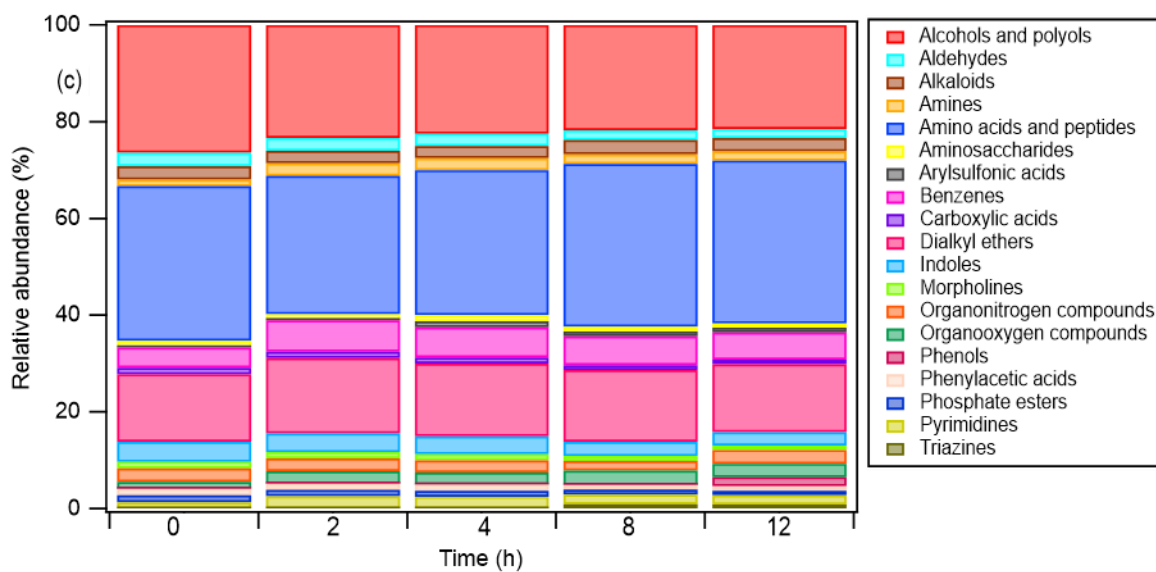

(b) Water-insoluble compounds

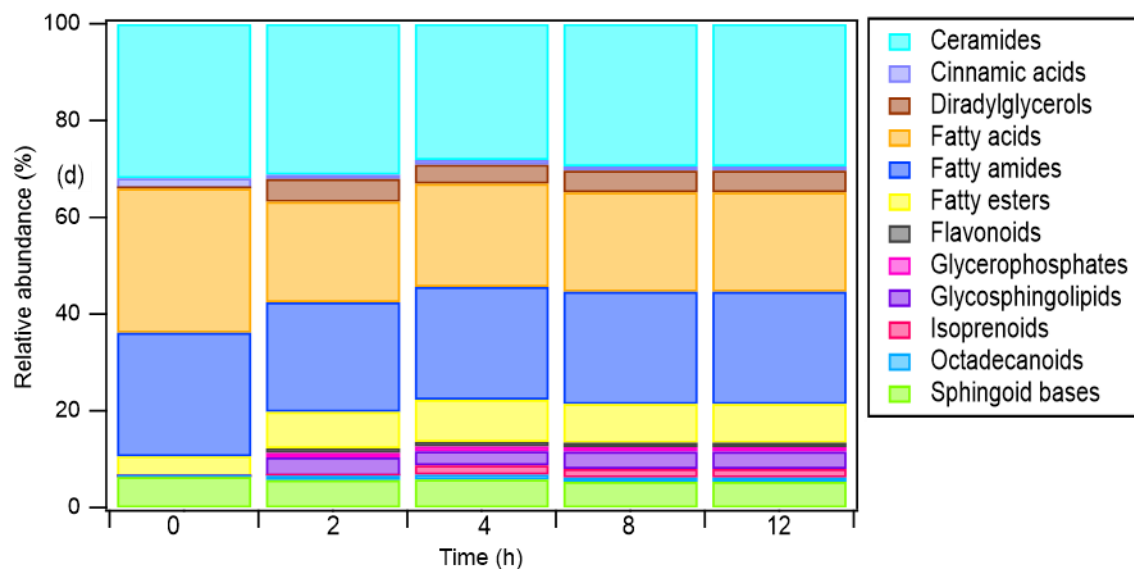

64

65 **Figure S7.** Relative abundance of the different classes of (c) water-soluble compounds, and (d)  
66 water-insoluble compounds from *E. hormaechei* pf0910 during exposure to simulated sunlight  
67 at pH 4.3.



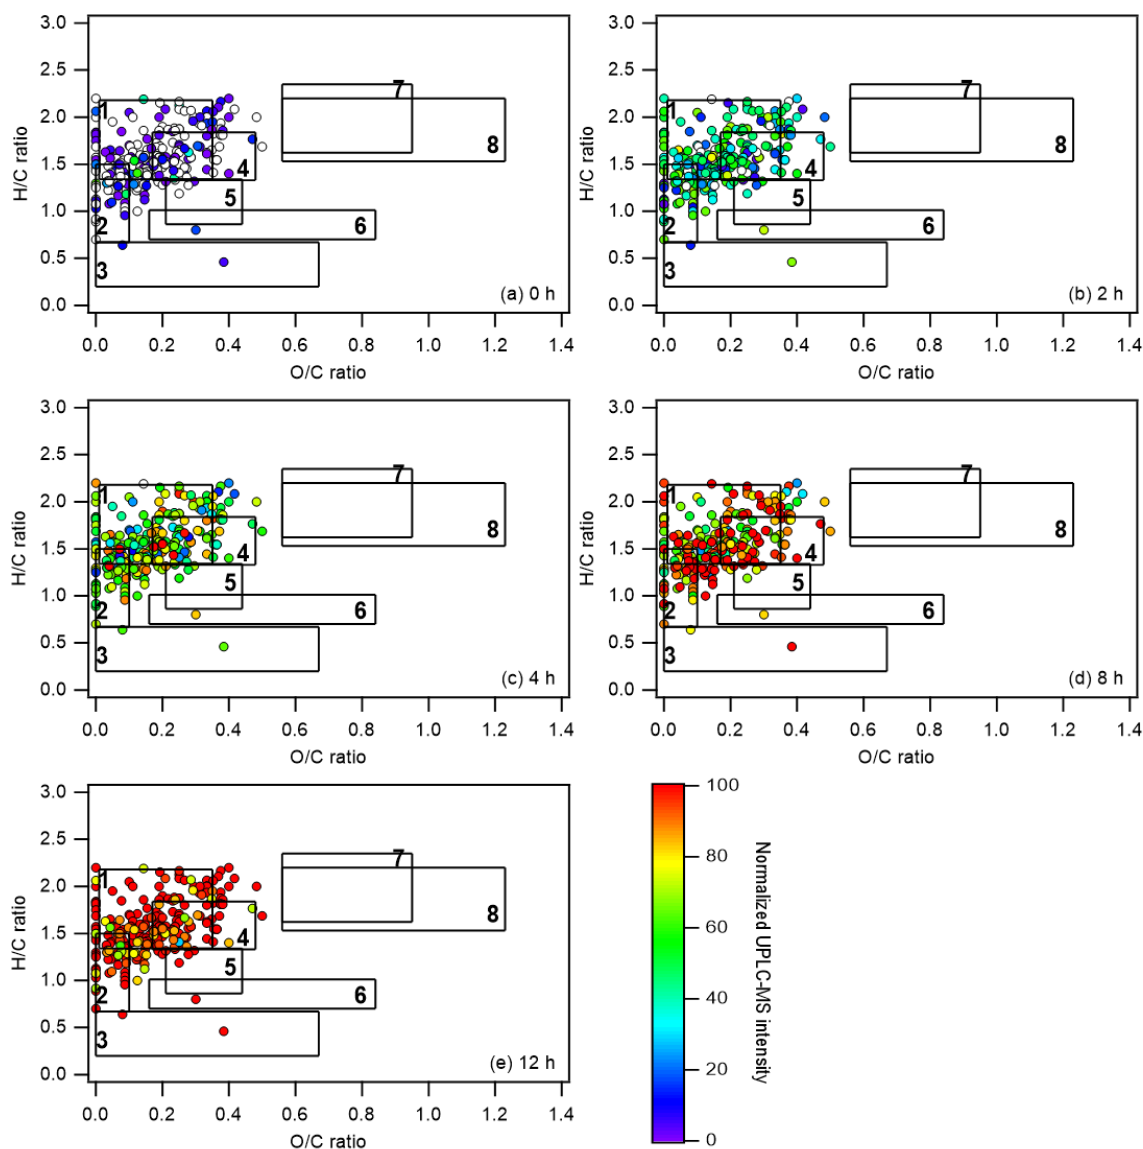

68

69 **Figure S8.** Van Krevelen diagrams of water-soluble compounds from *E. hormaechei* B0910  
70 during exposure to simulated sunlight at pH 4.3 taken at different time points of the experiment:  
71 (a) 0 h, (b) 2 h, (c) 4 h, (d) 8 h, and (e) 12 h. The color of each symbol denotes its UPLC-MS  
72 intensity at that specific time point normalized to its maximum UPLC-MS intensity obtained  
73 during the entire experiment. Symbols that are colored white indicates that these compounds  
74 were not detected at that specific time point. The Van Krevelen diagrams are divided into eight  
75 chemical classes based on their O/C and H/C ratios: (1) lipids, (2) unsaturated hydrocarbons,  
76 (3) condensed aromatic structures, (4) peptides, (5) lignin, (6) tannin, (7) amino sugars, and (8)  
77 carbohydrates.

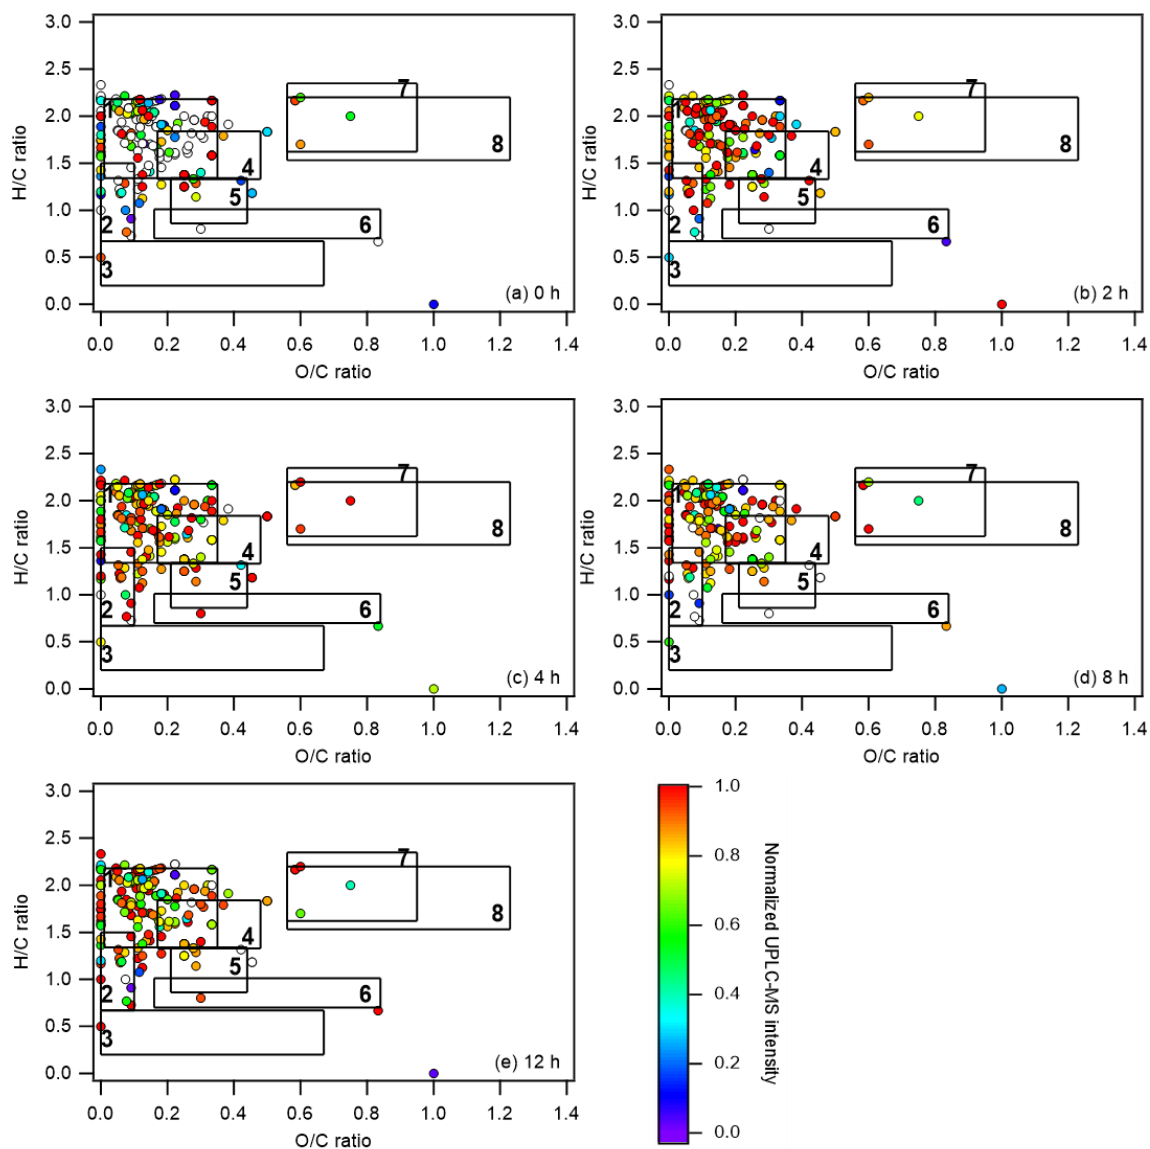

78

79 **Figure S9.** Van Krevelen diagrams of water-insoluble compounds from *E. hormaechei* B0910  
 80 during exposure to simulated sunlight at pH 4.3: (a) 0 h, (b) 2 h, (c) 4 h, (d) 8 h, and (e) 12 h.

81 The color of each symbol denotes its UPLC-MS intensity at that specific time point normalized  
 82 to its maximum UPLC-MS intensity obtained during the entire experiment. Symbols that are  
 83 colored white indicates that these compounds were not detected at that specific time point. The

84 Van Krevelen diagrams are divided into eight chemical classes based on their O/C and H/C  
 85 ratios: (1) lipids, (2) unsaturated hydrocarbons, (3) condensed aromatic structures, (4) peptides,  
 86 (5) lignin, (6) tannin, (7) amino sugars, and (8) carbohydrates.

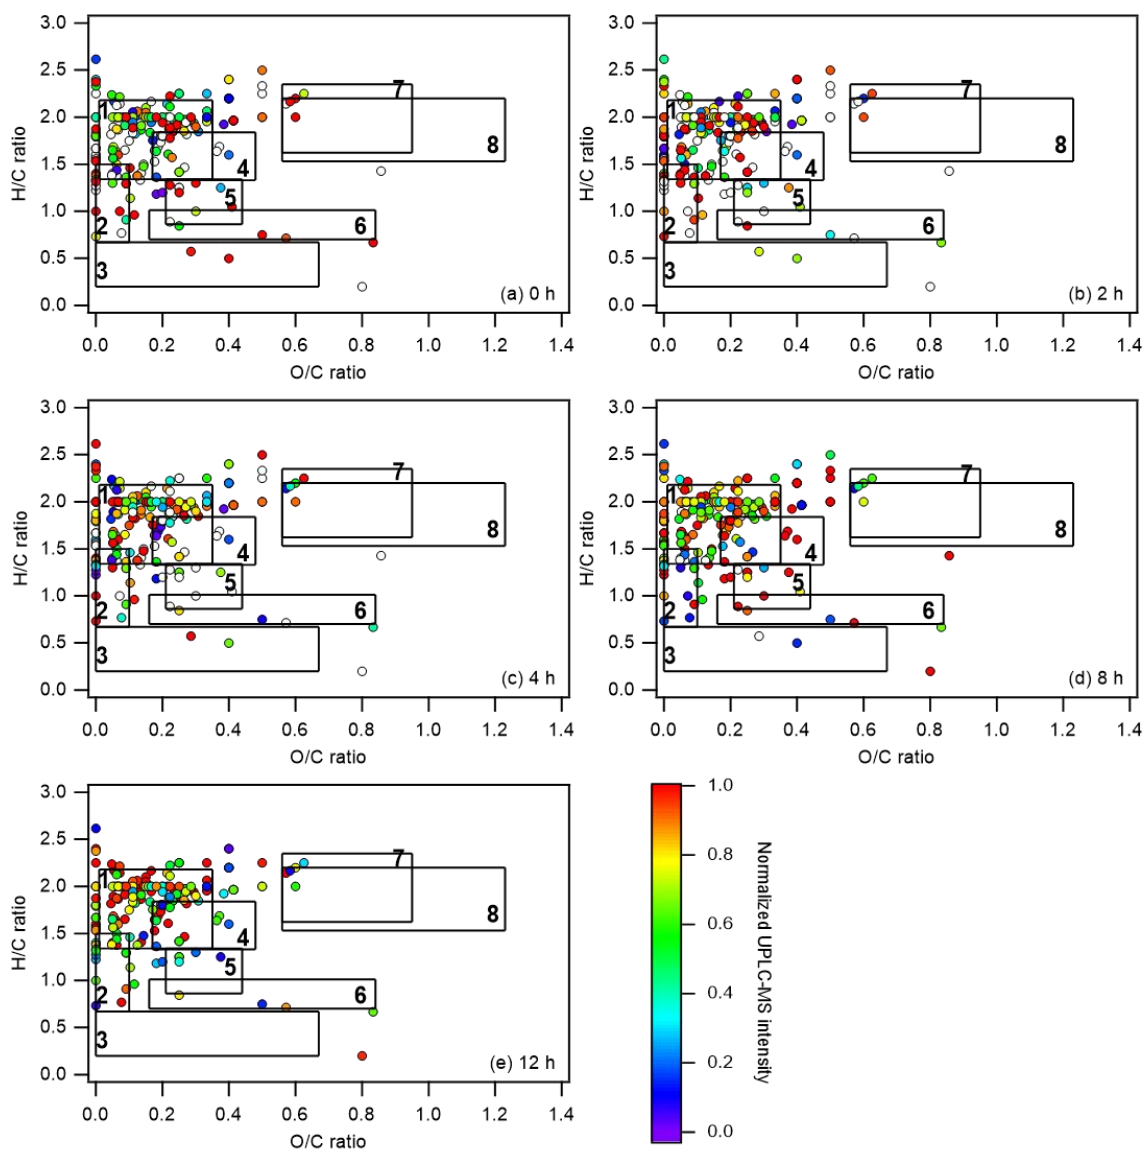

87

88 **Figure S10.** Van Krevelen diagrams of water-soluble compounds from *E. hormaechei* pf0910  
 89 during exposure to simulated sunlight at pH 4.3: (a) 0 h, (b) 2 h, (c) 4 h, (d) 8 h, and (e) 12 h.  
 90 The color of each symbol denotes its UPLC-MS intensity at that specific time point normalized  
 91 to its maximum UPLC-MS intensity obtained during the entire experiment. Symbols that are  
 92 colored white indicates that these compounds were not detected at that specific time point. The  
 93 Van Krevelen diagrams are divided into eight chemical classes based on their O/C and H/C  
 94 ratios: (1) lipids, (2) unsaturated hydrocarbons, (3) condensed aromatic structures, (4) peptides,  
 95 (5) lignin, (6) tannin, (7) amino sugars, and (8) carbohydrates.

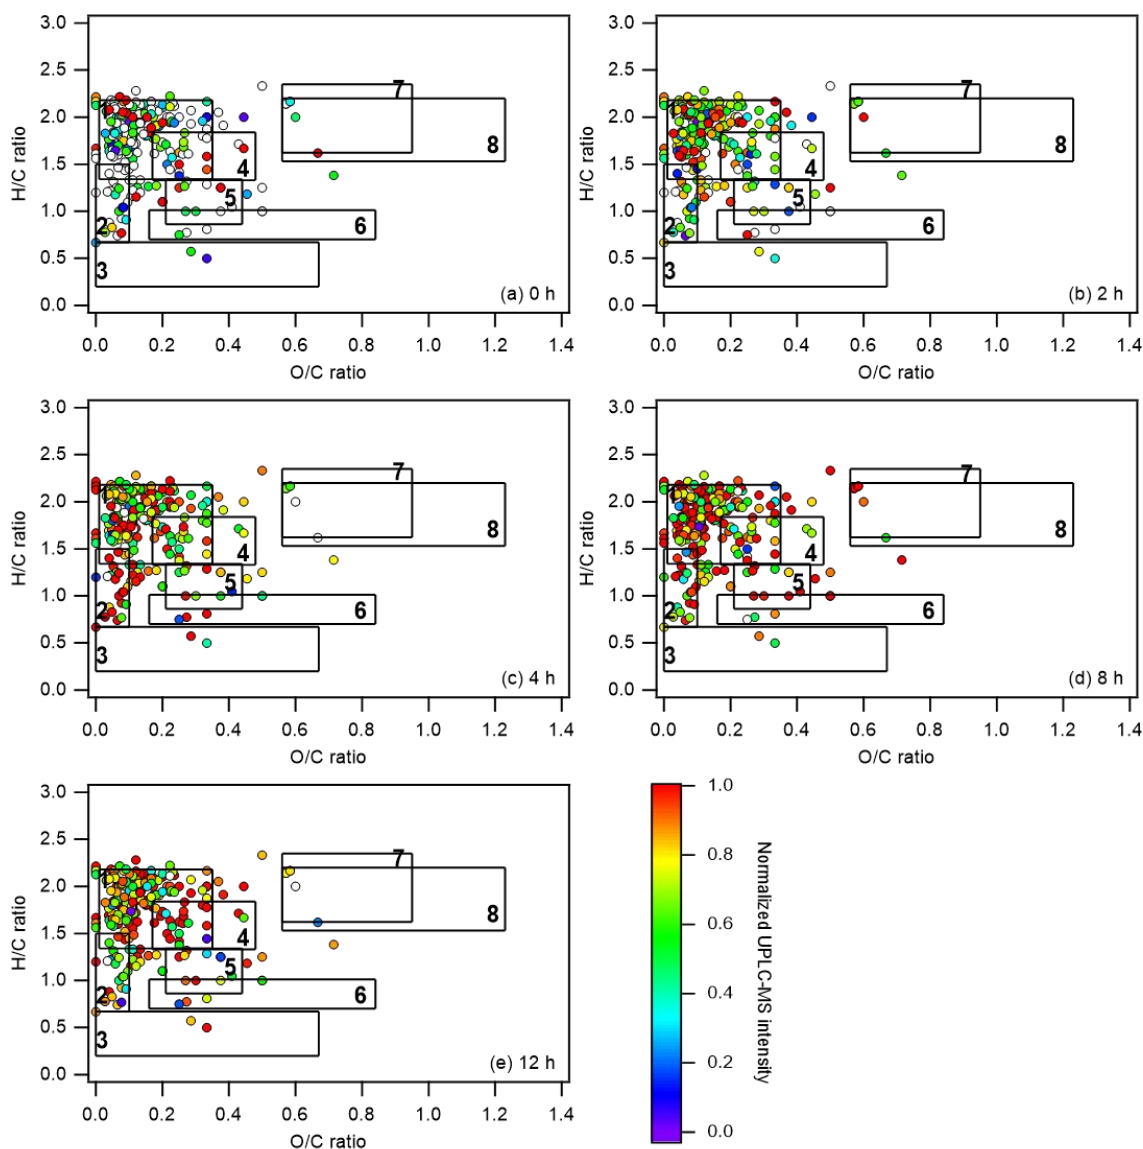

96

97 **Figure S11.** Van Krevelen diagrams of water-insoluble compounds from *E. hormaechei*  
 98 pf0910 during exposure to simulated sunlight at pH 4.3: (a) 0 h, (b) 2 h, (c) 4 h, (d) 8 h, and (e)  
 99 12 h. The color of each symbol denotes its UPLC-MS intensity at that specific time point  
 100 normalized to its maximum UPLC-MS intensity obtained during the entire experiment.  
 101 Symbols that are colored white indicates that these compounds were not detected at that  
 102 specific time point. The Van Krevelen diagrams are divided into eight chemical classes based  
 103 on their O/C and H/C ratios: (1) lipids, (2) unsaturated hydrocarbons, (3) condensed aromatic  
 104 structures, (4) peptides, (5) lignin, (6) tannin, (7) amino sugars, and (8) carbohydrates.

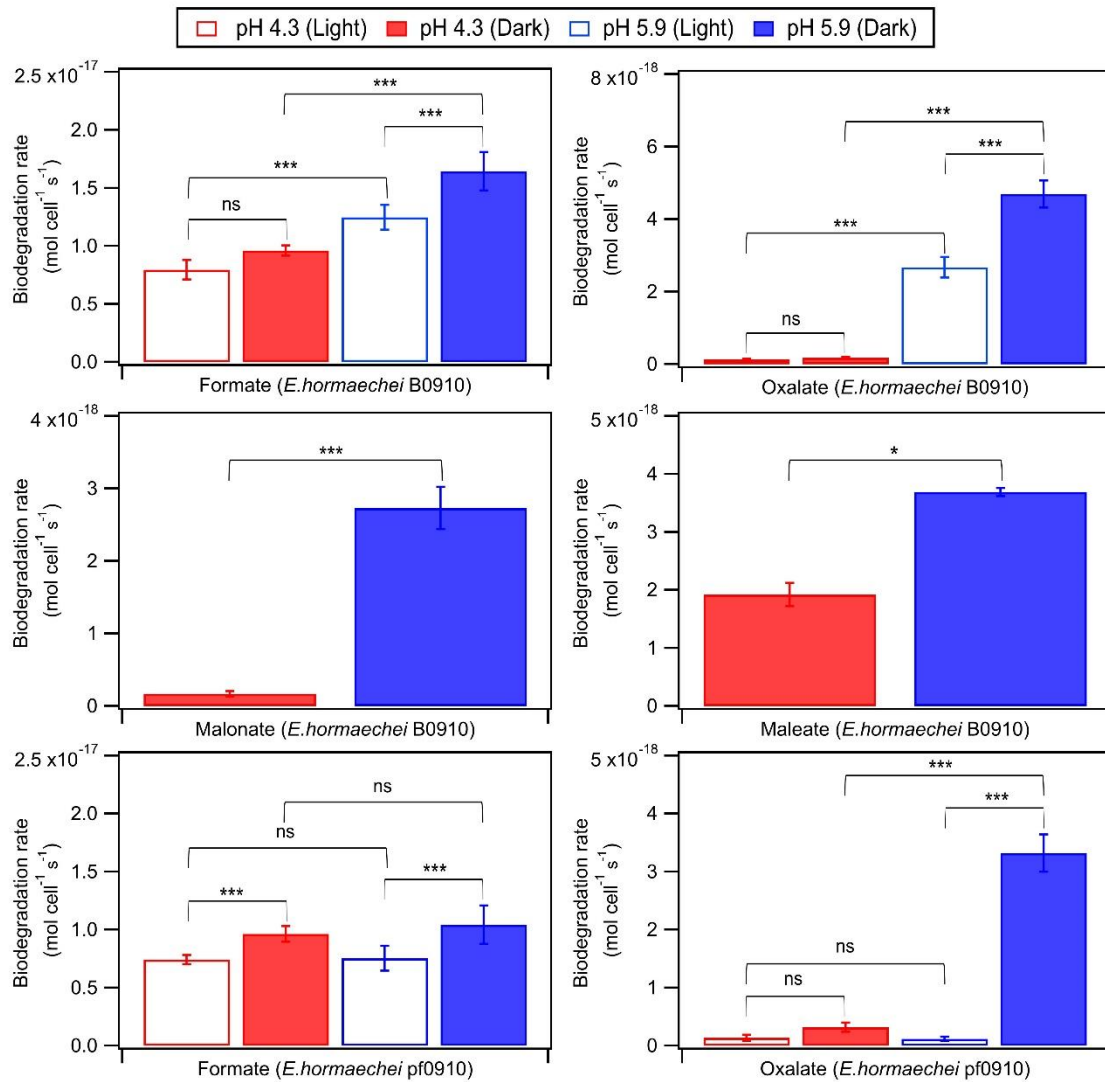

105

106 **Figure S12.** Biodegradation rates of oxalate, maleate, and malonate by (a) *E. hormaechei*  
 107 B0910 and (b) *E. hormaechei* pf0910 under light and dark conditions at pH 4.3 and pH 5.9.  
 108 Error bars represent one standard deviation from the mean of biological triplicates. Statistical  
 109 analysis was performed using the Student's t test (ns: not significant, \*:  $p$  value < 0.05, \*\*:  $p$   
 110 value < 0.01, \*\*\*:  $p$  value < 0.001).

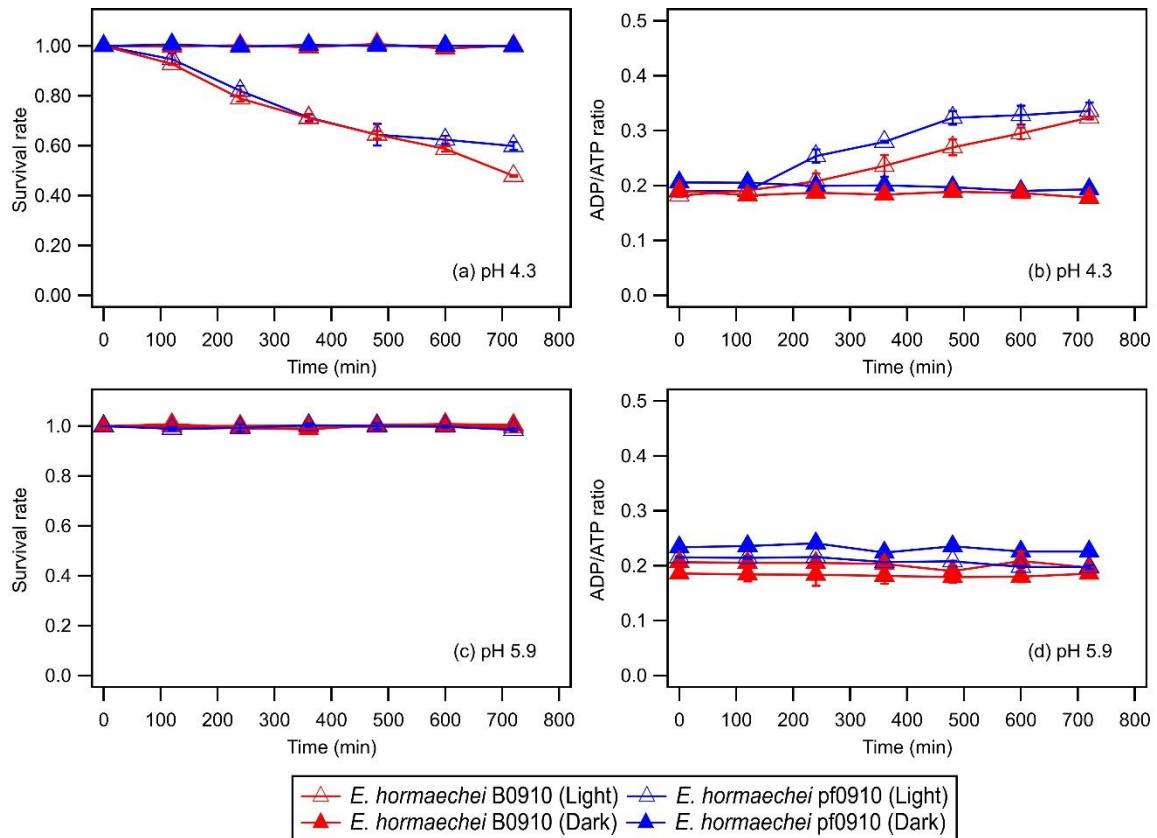

111

112 **Figure S13.** Survival and ADP/ATP ratios of *E. hormaechei* B0910 and *E. hormaechei* pf0910  
 113 under illuminated and dark conditions at pH 4.3 and pH 5.9 in the solutions containing the  
 114 seven organic acids. Error bars represent one standard deviation from the mean of biological  
 115 triplicates.

116

117

118

119

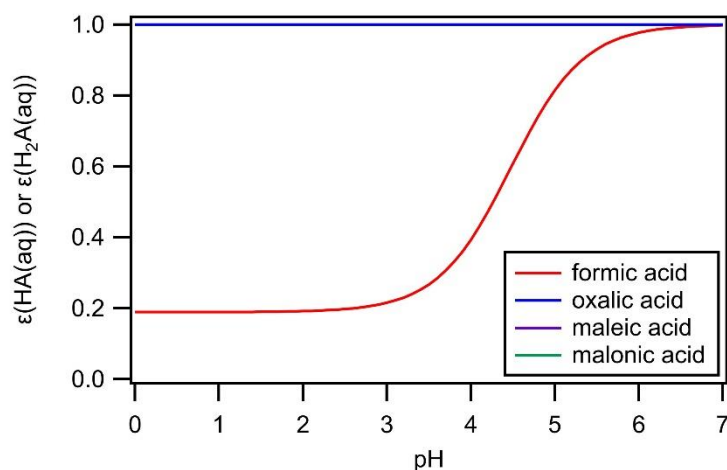

120

121 **Figure S14.** Calculated pH-dependent molar fraction of formic acid in the aqueous phase  
 122 ( $\epsilon(HA(aq))$ ) and pH-dependent molar fractions of oxalic acid, malonic acid, and maleic acid  
 123 in the aqueous phase ( $\epsilon(H_2A(aq))$ ) under cloud water conditions (Section S6 and Table S8).  
 124 A liquid water concentration of  $10^6 \mu\text{g m}^{-3}$  (Ervens et al., 2011) was assumed in these  
 125 calculations. A significant fraction of formic acid will be in the gas phase at pH 4 and 5 under  
 126 cloud water conditions, whereas all of the oxalic acid, malonic acid, and maleic acid will be in  
 127 the aqueous phase at pH 4 and 5 under cloud water conditions (note that their values overlap  
 128 one another at  $\epsilon(H_2A(aq)) = 1$ ). These differences were due primarily to the large differences  
 129 in their water solubility (i.e., Henry's law constants) (Table S8).

130

131

132

133

134

135

136

137

138

139

140

141 **Table S1.** Chemical composition of the artificial cloud water used to prepare bacterial cells  
 142 and perform experiments that investigated the effects of cloud water pH and light exposure on  
 143 the survival and energetic metabolism of bacteria. In the experiments, the pH of the artificial  
 144 cloud water was adjusted while keeping the final organic and inorganic ion composition the  
 145 same.

| Organic ion | $\mu\text{M}$ | Inorganic ion      | $\mu\text{M}$ |
|-------------|---------------|--------------------|---------------|
| Formate     | 17.1          | $\text{Na}^+$      | 93            |
| Acetate     | 10.2          | $\text{NH}_4^+$    | 235           |
| Pyruvate    | 2.7           | $\text{K}^+$       | 8             |
| Oxalate     | 10.3          | $\text{Mg}^{2+}$   | 23            |
|             |               | $\text{Ca}^{2+}$   | 49            |
|             |               | $\text{Cl}^-$      | 138           |
|             |               | $\text{SO}_4^{2-}$ | 305           |

146

147

148

149 **Table S2.** Chemical composition of the artificial cloud water used for organic acid  
 150 biodegradation experiments.

| Organic ion | $\mu\text{M}$ | Inorganic ion      | $\mu\text{M}$ |
|-------------|---------------|--------------------|---------------|
| Formate     | 50            | $\text{Na}^+$      | 930           |
| Acetate     | 50            | $\text{NH}_4^+$    | 2350          |
| Pyruvate    | 50            | $\text{K}^+$       | 80            |
| Oxalate     | 50            | $\text{Mg}^{2+}$   | 230           |
| Succinate   | 50            | $\text{Ca}^{2+}$   | 490           |
| Maleate     | 50            | $\text{Cl}^-$      | 1380          |
| Malonate    | 50            | $\text{SO}_4^{2-}$ | 3050          |
| Glutarate   | 50            |                    |               |
| MSA         | 50            |                    |               |

151

152

153

154

155

156



**Table S3.** Genes involved in the pH homeostasis in the two *E. hormaechei* strains.

| Transporters                                 | Protein subunits                      | <i>E. hormaechei</i> B0910 | <i>E. hormaechei</i> pf0910                                                                               |
|----------------------------------------------|---------------------------------------|----------------------------|-----------------------------------------------------------------------------------------------------------|
|                                              |                                       | CDS                        | CDS                                                                                                       |
| F1F0-type ATP synthase                       | Subunit a, AtpB                       | MOG78_16595                | MMW20_13045                                                                                               |
|                                              | Subunit c, AtpE                       | MOG78_16590                | MMW20_13050                                                                                               |
|                                              | Subunit b, AtpF                       | MOG78_16585                | MMW20_13055                                                                                               |
|                                              | Subunit delta, AtpH                   | MOG78_16580                | MMW20_13060                                                                                               |
|                                              | Subunit alpha, AtpA                   | MOG78_16575                | MMW20_13065                                                                                               |
|                                              | Subunit gamma, AtpG                   | MOG78_16570                | MMW20_13070                                                                                               |
|                                              | Subunit beta, AtpD                    | MOG78_16565                | MMW20_13075                                                                                               |
|                                              | Subunit epsilon, AtpC                 | MOG78_16560                | MMW20_13080                                                                                               |
| Kdp-type high-affinity potassium transporter | Potassium-binding ATPase subunit KdpA | MOG78_10080                | MMW20_19865                                                                                               |
|                                              | Potassium-binding ATPase subunit KdpB | MOG78_10085                | MMW20_19860                                                                                               |
|                                              | Potassium-binding ATPase subunit KdpC | MOG78_10090                | MMW20_19855                                                                                               |
|                                              | Potassium-binding ATPase subunit KdpF | MOG78_10075                | Gene sequence found but CDS is not annotated.<br>(Chromosome genome nucleotide position: 3800683-3800772) |
| Kup-type low-affinity potassium transporter  | Kup                                   | MOG78_16640                | MMW20_13000                                                                                               |

158

159

160

161

162

163

164

165

166

167 **Table S4.** Stoichiometric ranges of the eight chemical classes in VK diagrams (Bauer et al.,  
 168 2002; Jaenicke, 2005).

| <b>Chemical class</b>                               | <b>H/C</b>                       | <b>O/C</b>                       |
|-----------------------------------------------------|----------------------------------|----------------------------------|
| Amino sugar (Burrows et al., 2009)                  | $1.62 \leq \text{H/C} \leq 2.35$ | $0.56 \leq \text{O/C} \leq 0.95$ |
| Carbohydrate (Jaenicke, 2005)                       | $1.53 \leq \text{H/C} \leq 2.20$ | $0.56 \leq \text{O/C} \leq 1.23$ |
| Lignin (Möhler et al., 2007)                        | $0.86 \leq \text{H/C} \leq 1.34$ | $0.21 \leq \text{O/C} \leq 0.44$ |
| Lipid (Burrows et al., 2009)                        | $1.34 \leq \text{H/C} \leq 2.18$ | $0.01 \leq \text{O/C} \leq 0.35$ |
| Peptide (Attard et al., 2012)                       | $1.33 \leq \text{H/C} \leq 1.84$ | $0.17 \leq \text{O/C} \leq 0.48$ |
| Tannin (Hu et al., 2018)                            | $0.70 \leq \text{H/C} \leq 1.01$ | $0.16 \leq \text{O/C} \leq 0.84$ |
| Unsaturated hydrocarbons (Amato et al., 2005)       | $0.67 \leq \text{H/C} \leq 1.5$  | $0 \leq \text{O/C} \leq 0.10$    |
| Condensed aromatic structures (Delort et al., 2010) | $0.20 \leq \text{H/C} \leq 0.67$ | $0 \leq \text{O/C} \leq 0.67$    |

169

170 **Table S5.** Genes involved in the biodegradation of organic acids in the two *E. hormaechei*  
 171 strains.

| Organic acid | Genes                                               | <i>E. hormaechei</i> B0910 |                                                                             | <i>E. hormaechei</i> pf0910 |                                                                             |
|--------------|-----------------------------------------------------|----------------------------|-----------------------------------------------------------------------------|-----------------------------|-----------------------------------------------------------------------------|
|              |                                                     | Biodegradation             | CDS                                                                         | Biodegradation              | CDS                                                                         |
|              |                                                     | Yes/No                     | Absent/Present                                                              | Yes/No                      | Absent/Present                                                              |
| Formic acid  | Formate dehydrogenase                               | Yes                        | MOG78_16880;<br>MOG78_16875;<br>MOG78_16870;<br>MOG78_06810                 | Yes                         | MMW20_12765;<br>MMW20_12770;<br>MMW20_12775;<br>MMW20_22665                 |
|              | Oxalate decarboxylase                               | Yes                        | Absent                                                                      | Yes                         | Absent                                                                      |
|              | Oxalate oxidase                                     | Yes                        | Absent                                                                      | Yes                         | Absent                                                                      |
| Oxalic acid  | Formyl-CoA:oxalate CoA-transferase                  | Yes                        | Absent                                                                      | Yes                         | Absent                                                                      |
|              | Succinyl-CoA:oxalate CoA-transferase                | Yes                        | Absent                                                                      | Yes                         | Absent                                                                      |
|              | Hypothetical protein (Cupin 2 protein) <sup>a</sup> | Yes                        | MOG78_20825                                                                 | Yes                         | MMW20_08875                                                                 |
| Malonic acid | Malonate decarboxylase                              | Yes                        | MOG78_18565;<br>MOG78_18550;<br>MOG78_18545;<br>MOG78_18540;<br>MOG78_18530 | No                          | MMW20_11060;<br>MMW20_11075;<br>MMW20_11080;<br>MMW20_11085;<br>MMW20_11095 |
|              | Malonate CoA-transferase                            | Yes                        | Absent                                                                      | No                          | Absent                                                                      |
|              | Malonate-semialdehyde dehydrogenase                 | Yes                        | Absent                                                                      | No                          | Absent                                                                      |
|              | Malonyl-CoA/methylmalonyl-CoA synthetase            | Yes                        | Absent                                                                      | No                          | Absent                                                                      |
| Maleic acid  | Maleate isomerase                                   | Yes                        | Absent                                                                      | No                          | Absent                                                                      |
|              | Maleate hydratase                                   | Yes                        | Absent                                                                      | No                          | Absent                                                                      |
|              | 3-isopropylmalate dehydratase <sup>a</sup>          | Yes                        | MOG78_13080;<br>MOG78_13075                                                 | No                          | MMW20_17000;<br>MMW20_17005                                                 |
| Acetic acid  | Acetyl-CoA synthetase                               | No                         | MOG78_14765                                                                 | No                          | MMW20_14980                                                                 |
|              | Acetate kinase                                      | No                         | MOG78_01250                                                                 | No                          | MMW20_05785                                                                 |
|              | Aldehyde dehydrogenase                              | No                         | MOG78_17415                                                                 | No                          | MMW20_12230                                                                 |
|              | ActP <sup>b</sup>                                   | No                         | MOG78_14775                                                                 | No                          | MMW20_14970                                                                 |

|                       |                                                                                          |    |                             |    |                             |
|-----------------------|------------------------------------------------------------------------------------------|----|-----------------------------|----|-----------------------------|
|                       | SatP <sup>b</sup>                                                                        | No | MOG78_13285                 | No | MMW20_16750                 |
| Methane sulfonic acid | Alkanesulfonate monooxygenase                                                            | No | MOG78_08820;<br>MOG78_08810 | No | MMW20_21175;<br>MMW20_21185 |
| Glutaric acid         | Succinate-semialdehyde dehydrogenase / glutarate-semialdehyde dehydrogenase <sup>c</sup> | No | MOG78_19060;<br>MOG78_13695 | No | MMW20_10560;<br>MMW20_16345 |
|                       | Glutaryl-CoA synthetase                                                                  | No | Absent                      | No | Absent                      |
|                       | Glutarate dioxygenase                                                                    | No | Absent                      | No | Absent                      |

<sup>a</sup> Genes are not canonical but may involve in the biodegradation of organic acids.

<sup>b</sup> Transporter proteins involved in uptake of acetic acid for biodegradation

<sup>c</sup> No reverse catalysis in the direction from glutarate to glutarate-semialdehyde has been reported in the literature.

172

173

174

175

176

177

178 **Table S6.** Concentration of radicals and cells used to estimate the loss rates by biodegradation  
179 and chemical reactions in Table S6.

| Radical concentration/<br>Cell concentration | Area   | Concentration         | Reference                  |
|----------------------------------------------|--------|-----------------------|----------------------------|
| ·OH (M)                                      | Remote | $2.2 \times 10^{-14}$ | (Vaitilingom et al., 2010) |
|                                              | Marine | $2.0 \times 10^{-12}$ | (Vaitilingom et al., 2013) |
|                                              | Urban  | $3.5 \times 10^{-15}$ | (Morris et al., 2014)      |
| NO <sub>3</sub> · (M)                        | Remote | $5.1 \times 10^{-15}$ | (Morris et al., 2017)      |
|                                              | Marine | $6.9 \times 10^{-15}$ | (Hu et al., 2018)          |
|                                              | Urban  | $1.4 \times 10^{-13}$ | (Huang et al., 2021)       |
| Cell (cell L <sup>-1</sup> )                 |        | $8.0 \times 10^7$     | (Zhang et al., 2021)       |

180

181 **Table S7.** Estimations of the loss rates of formate, oxalate, and malonate by biodegradation and chemical reactions (i.e.,  $\cdot\text{OH}$  oxidation (daytime) and  $\text{NO}_3\cdot$  (nighttime)). These loss rates were calculated based on  
 182 concentrations and pH measured at the different sites. Equations used in these calculations can be found in Section S6. References used to obtain the pH of cloud/rainwater and organic acids are indicated in superscripts.  
 183 The biodegradation and chemical reaction loss rates calculated here were used to generate Figure 5.

184 **Daytime**

| Location (remote)                                       | Category | pH                                 | Formate ( $\mu\text{M}$ )        | Formate loss rate ( $\text{M s}^{-1}$ ) |                        |                           | Oxalate ( $\mu\text{M}$ )       | Oxalate loss rate ( $\text{M s}^{-1}$ ) |                        |                           |
|---------------------------------------------------------|----------|------------------------------------|----------------------------------|-----------------------------------------|------------------------|---------------------------|---------------------------------|-----------------------------------------|------------------------|---------------------------|
|                                                         |          |                                    |                                  | bio (pH ~4)                             | bio (pH ~5)            | $\cdot\text{OH}$ (remote) |                                 | bio (pH ~4)                             | bio (pH ~5)            | $\cdot\text{OH}$ (remote) |
| Mount Lu(Möhler et al., 2007)                           | Cloud    | 3.81 (Vaitilingom et al., 2012)    | 10.83 (Wei et al., 2017)         | $1.34 \times 10^{-10}$                  |                        | $5.72 \times 10^{-10}$    | 4.95 (Zhu et al., 2018)         | $1.06 \times 10^{-12}$                  |                        | $1.74 \times 10^{-11}$    |
| Mount Lu(Wei et al., 2017)                              | Rain     | 4.44 (Peng et al., 2019)           | 10.21 (Amato et al., 2005)       | $1.26 \times 10^{-10}$                  |                        | $5.39 \times 10^{-10}$    | 2.54 (Burrows et al., 2009)     | $5.44 \times 10^{-13}$                  |                        | $8.92 \times 10^{-12}$    |
| Mount Heng(Amato et al., 2017)                          | Cloud    | 3.8 (Amato et al., 2005)           | 19.65 (Amato et al., 2017)       | $2.43 \times 10^{-10}$                  |                        | $1.04 \times 10^{-9}$     | 5.11 (Wei et al., 2017)         | $1.10 \times 10^{-12}$                  |                        | $1.80 \times 10^{-11}$    |
| Mount Heng(Delort et al., 2010)                         | Rain     | 4.35 (Vaitilingom et al., 2010)    | 14.30 (Vaitilingom et al., 2013) | $1.77 \times 10^{-10}$                  |                        | $7.55 \times 10^{-10}$    | 1.66 (Ervens and Amato, 2020)   | $3.55 \times 10^{-13}$                  |                        | $5.83 \times 10^{-12}$    |
| Mangdang Mountain(Ariya et al., 2002)                   | Rain     | 4.81 (Husárová et al., 2011)       | 7.90 (Vaitilingom et al., 2011)  | $9.78 \times 10^{-11}$                  |                        | $4.17 \times 10^{-10}$    | 1.80 (Jaber et al., 2020)       | $3.86 \times 10^{-13}$                  |                        | $6.34 \times 10^{-12}$    |
| Taiwan(Jaber et al., 2021)                              | Cloud    | 3.91 (Joly et al., 2015)           | 5.74 (Davey and O'toole, 2000)   | $7.11 \times 10^{-11}$                  |                        | $3.03 \times 10^{-10}$    | 6.60 (Delort et al., 2010)      | $1.42 \times 10^{-12}$                  |                        | $2.32 \times 10^{-11}$    |
| Kleiner Feldberg, Germany(Flemming and Wingender, 2010) | Cloud    | 3.9-4.6 (Vaitilingom et al., 2012) | 3.26 (Matulova et al., 2014)     | $4.03 \times 10^{-11}$                  |                        | $1.72 \times 10^{-10}$    | ND                              |                                         |                        |                           |
| Whiteface Mountain, USA(Amato et al., 2005)             | Cloud    | 3.1-4.4 (Peng et al., 2019)        | 25.20 (Amato et al., 2005)       | $3.12 \times 10^{-10}$                  |                        | $1.33 \times 10^{-9}$     | 9.66 (Pye et al., 2020)         | $2.07 \times 10^{-12}$                  |                        | $3.40 \times 10^{-11}$    |
| Rax, Austria(Shah et al., 2020)                         | Cloud    | 3.84 (Li et al., 2020)             | 13.25 (Pye et al., 2020)         | $1.64 \times 10^{-10}$                  |                        | $7.00 \times 10^{-10}$    | 5.11 (Shah et al., 2020)        | $1.10 \times 10^{-12}$                  |                        | $1.80 \times 10^{-11}$    |
| Sonnblick, Austria(Qu and Han, 2021)                    | Cloud    | 5.0-6.5 (Anglada et al., 2015)     | 6.30 (Joly et al., 2015)         |                                         | $9.79 \times 10^{-11}$ | $3.33 \times 10^{-10}$    | 1.89 (Vaitilingom et al., 2011) |                                         | $3.61 \times 10^{-12}$ | $6.65 \times 10^{-12}$    |
| Mount Tai, China(Joly et al., 2015)                     | Cloud    | 4.6 (Jaber et al., 2021)           | 31.80 (Jaber et al., 2020)       | $3.94 \times 10^{-10}$                  |                        | $1.68 \times 10^{-9}$     | 11.10 (Li et al., 2020)         | $2.38 \times 10^{-12}$                  |                        | $3.91 \times 10^{-11}$    |
| Shangzhong(Qu and Han, 2021)                            | Rain     | ND                                 | 4.95 (Peng et al., 2019)         | $6.13 \times 10^{-11}$                  |                        | $2.61 \times 10^{-10}$    | 1.16 (Chen et al., 2012)        | $2.48 \times 10^{-13}$                  |                        | $4.07 \times 10^{-12}$    |
| São Paulo State, Brazil(Després et al., 2012)           | Rain     | 4.96 (Ding et al., 2015)           | 7.80 (Zhou et al., 2018)         |                                         | $1.21 \times 10^{-10}$ | $4.12 \times 10^{-10}$    | 1.20 (Prokof'eva et al., 2021)  |                                         | $2.29 \times 10^{-12}$ | $4.22 \times 10^{-12}$    |

  

| Location (Marine)               | Category | pH                         | Formate ( $\mu\text{M}$ )    | Formate loss rate ( $\text{M s}^{-1}$ ) |                        |                           | Oxalate ( $\mu\text{M}$ )  | Oxalate loss rate ( $\text{M s}^{-1}$ ) |                        |                           |
|---------------------------------|----------|----------------------------|------------------------------|-----------------------------------------|------------------------|---------------------------|----------------------------|-----------------------------------------|------------------------|---------------------------|
|                                 |          |                            |                              | bio (pH ~4)                             | bio (pH ~5)            | $\cdot\text{OH}$ (marine) |                            | bio (pH ~4)                             | bio (pH ~5)            | $\cdot\text{OH}$ (marine) |
| Puerto Rico                     | Cloud    | 5.5 (Romano et al., 2019)  | 1.00 (Ruiz-Gil et al., 2020) |                                         | $1.55 \times 10^{-11}$ | $4.80 \times 10^{-9}$     | 0.50 (Romano et al., 2021) |                                         | $9.55 \times 10^{-13}$ | $1.60 \times 10^{-10}$    |
| Puerto Rico(Tsai and Kuo, 2013) | Rain     | 5.3 (Löflund et al., 2002) | 0.20 (Sun et al., 2016)      |                                         | $3.11 \times 10^{-12}$ | $9.60 \times 10^{-10}$    | 0.00 (Li et al., 2020)     |                                         |                        |                           |

| Location (Urban)                             | Category | pH                                 | Formate ( $\mu\text{M}$ )        | Formate loss rate ( $\text{M s}^{-1}$ ) |             |                          | Oxalate ( $\mu\text{M}$ )       | Oxalate loss rate ( $\text{M s}^{-1}$ ) |             |                          |                        |
|----------------------------------------------|----------|------------------------------------|----------------------------------|-----------------------------------------|-------------|--------------------------|---------------------------------|-----------------------------------------|-------------|--------------------------|------------------------|
|                                              |          |                                    |                                  | bio (pH ~4)                             | bio (pH ~5) | $\cdot\text{OH}$ (urban) |                                 | bio (pH ~4)                             | bio (pH ~5) | $\cdot\text{OH}$ (urban) |                        |
| Puy de dome(Vaitilingom et al., 2010)        | Cloud    | 6.1 (Vaitilingom et al., 2011)     | 4.90 (George et al., 2015)       |                                         |             | $7.61 \times 10^{-11}$   | $2.35 \times 10^{-8}$           | 1.00 (Huang et al., 2018)               |             | $1.91 \times 10^{-12}$   | $3.20 \times 10^{-10}$ |
| Shenzhen, South China(Misovich et al., 2021) | Rain     | 4.56 (Li et al., 2020)             | 2.26 (Tsai and Kuo, 2013)        | $2.80 \times 10^{-11}$                  |             |                          | 0.58 (Löfflund et al., 2002)    | $1.23 \times 10^{-13}$                  |             | $3.22 \times 10^{-13}$   |                        |
| Anshun(Sun et al., 2016)                     | Rain     | 4.67 (Li et al., 2020)             | 8.77 (Vaitilingom et al., 2010)  | $1.09 \times 10^{-10}$                  |             |                          | 2.84 (Jaber et al., 2020)       | $6.09 \times 10^{-13}$                  |             | $1.59 \times 10^{-12}$   |                        |
| Newark US East Coast(Jaber et al., 2021)     | Rain     | 4.6 (Vaitilingom et al., 2011)     | 4.44 (Jaber et al., 2020)        | $5.50 \times 10^{-11}$                  |             |                          | 0.68 (Jaber et al., 2021)       | $1.46 \times 10^{-13}$                  |             | $3.81 \times 10^{-13}$   |                        |
| Hong Kong SAR(Bearson et al., 1997)          | Cloud    | 3.87 (Lund et al., 2014)           | 17.10 (Bearson et al., 1997)     | $2.12 \times 10^{-10}$                  |             |                          | 10.30 (Davey and O'toole, 2000) | $2.21 \times 10^{-12}$                  |             | $5.77 \times 10^{-12}$   |                        |
| Puy de dome(Delort et al., 2010)             | Cloud    | 3.9 (Flemming and Wingender, 2010) | 33.20 (Vaitilingom et al., 2012) | $4.11 \times 10^{-10}$                  |             |                          | 9.30 (Matulova et al., 2014)    | $1.99 \times 10^{-12}$                  |             | $5.21 \times 10^{-12}$   |                        |

185 ND: No data

186 **Nighttime**

| Location (remote)                           | Category | pH                              | Formate ( $\mu\text{M}$ )     | Formate loss rate ( $\text{M s}^{-1}$ ) |             |                             | Oxalate ( $\mu\text{M}$ )           | Oxalate loss rate ( $\text{M s}^{-1}$ ) |             |                             | Malonate ( $\mu\text{M}$ )   | Malonate loss rate ( $\text{M s}^{-1}$ ) |                        |                             |
|---------------------------------------------|----------|---------------------------------|-------------------------------|-----------------------------------------|-------------|-----------------------------|-------------------------------------|-----------------------------------------|-------------|-----------------------------|------------------------------|------------------------------------------|------------------------|-----------------------------|
|                                             |          |                                 |                               | bio (pH ~4)                             | bio (pH ~5) | $\text{NO}_3\cdot$ (remote) |                                     | bio (pH ~4)                             | bio (pH ~5) | $\text{NO}_3\cdot$ (remote) |                              | bio (pH ~4)                              | bio (pH ~5)            | $\text{NO}_3\cdot$ (remote) |
| Mount Lu(Guan and Liu, 2020)                | Cloud    | 3.81 (Davey and O'toole, 2000)  | 10.83 (Delort et al., 2010)   | $1.69 \times 10^{-10}$                  |             | $2.32 \times 10^{-12}$      | 4.95 (Flemming and Wingender, 2010) | $2.07 \times 10^{-12}$                  |             | $1.11 \times 10^{-12}$      | ND                           |                                          |                        |                             |
| Mount Lu(Vaitilingom et al., 2012)          | Rain     | 4.44 (Matulova et al., 2014)    | 10.21 (Bianco et al., 2018)   | $1.59 \times 10^{-10}$                  |             | $2.19 \times 10^{-12}$      | 2.54 (Laszakovits and Mackay, 2022) | $1.06 \times 10^{-12}$                  |             | $5.69 \times 10^{-13}$      | ND                           |                                          |                        |                             |
| Mount Heng(Watson et al., 2007)             | Cloud    | 3.8 (Rivas-Ubach et al., 2018)  | 19.65 (Matulova et al., 2014) | $3.06 \times 10^{-10}$                  |             | $4.21 \times 10^{-12}$      | 5.11 (Bianco et al., 2016)          | $2.14 \times 10^{-12}$                  |             | $1.15 \times 10^{-12}$      | ND                           |                                          |                        |                             |
| Mount Heng(Tyagi et al., 2015)              | Rain     | 4.35 (Jaber et al., 2021)       | 14.30 (Bianco et al., 2019)   | $2.23 \times 10^{-10}$                  |             | $3.06 \times 10^{-12}$      | 1.66 (Vaitilingom et al., 2010)     | $6.94 \times 10^{-13}$                  |             | $3.71 \times 10^{-13}$      | ND                           |                                          |                        |                             |
| Mangdang Mountain(Vaitilingom et al., 2011) | Rain     | 4.81 (Fankhauser et al., 2019)  | 7.90 (Makuc et al., 2001)     | $1.23 \times 10^{-10}$                  |             | $1.69 \times 10^{-12}$      | 1.80 (Tilgner et al., 2021)         | $7.55 \times 10^{-13}$                  |             | $4.04 \times 10^{-13}$      | 1.40 (Koutny et al., 2006)   |                                          | $5.16 \times 10^{-12}$ | $4.00 \times 10^{-14}$      |
| Taiwan(Guan and Liu, 2020)                  | Cloud    | 3.91 (Vaitilingom et al., 2011) | 5.74 (Jaber et al., 2020)     | $8.95 \times 10^{-11}$                  |             | $1.23 \times 10^{-12}$      | 6.60 (Jaber et al., 2021)           | $2.77 \times 10^{-12}$                  |             | $1.48 \times 10^{-12}$      | 0.16 (Herrmann et al., 2010) | $3.65 \times 10^{-14}$                   |                        | $4.57 \times 10^{-15}$      |

|                                                     |       |                                    |                               |                        |                        |                        |                                  |                        |                        |                        |                                 |                        |                        |
|-----------------------------------------------------|-------|------------------------------------|-------------------------------|------------------------|------------------------|------------------------|----------------------------------|------------------------|------------------------|------------------------|---------------------------------|------------------------|------------------------|
| Kleiner Feldberg, Germany(Vaitilingom et al., 2011) | Cloud | 3.9-4.6 (Jaber et al., 2020)       | 3.26 (Jaber et al., 2021)     | $5.08 \times 10^{-11}$ |                        | $6.98 \times 10^{-13}$ | ND                               |                        |                        |                        | ND                              |                        |                        |
| Whiteface Mountain, USA(Herrmann et al., 2010)      | Cloud | 3.1-4.4 (Ervens et al., 2003)      | 25.20 (Herrmann et al., 2010) | $3.93 \times 10^{-10}$ |                        | $5.40 \times 10^{-12}$ | 9.66 (Vaitilingom et al., 2010)  | $4.05 \times 10^{-12}$ | $2.17 \times 10^{-12}$ |                        | 7.69 (Vaitilingom et al., 2011) | $1.75 \times 10^{-12}$ | $2.20 \times 10^{-13}$ |
| Rax, Austria(Fankhauser et al., 2019)               | Cloud | 3.84 (Pye et al., 2020)            | 13.25 (Li et al., 2020)       | $2.07 \times 10^{-10}$ |                        | $2.84 \times 10^{-12}$ | 5.11 (Pye et al., 2020)          | $2.14 \times 10^{-12}$ | $1.15 \times 10^{-12}$ |                        | 1.92 (Shah et al., 2020)        | $4.38 \times 10^{-13}$ | $5.49 \times 10^{-14}$ |
| Sonnblick, Austria(Qu and Han, 2021)                | Cloud | 5.0-6.5 (Vaitilingom et al., 2012) | 6.30 (Zhu et al., 2018)       |                        | $1.32 \times 10^{-10}$ | $1.35 \times 10^{-12}$ | 1.89 (Peng et al., 2019)         |                        | $1.19 \times 10^{-11}$ | $4.24 \times 10^{-13}$ | 0.38 (Ariya et al., 2002)       | $1.42 \times 10^{-12}$ | $1.10 \times 10^{-14}$ |
| Mount Tai, China(Vaitilingom et al., 2010)          | Cloud | 4.6 (Husárová et al., 2011)        | 31.80                         | $4.96 \times 10^{-10}$ |                        | $6.81 \times 10^{-12}$ | 11.10 (Vaitilingom et al., 2011) | $4.65 \times 10^{-12}$ | $2.49 \times 10^{-12}$ |                        | ND                              |                        |                        |
| Shangzhong(Xu et al., 2009)                         | Rain  |                                    | 4.95                          | $7.71 \times 10^{-11}$ |                        | $1.06 \times 10^{-12}$ | 1.16                             | $4.84 \times 10^{-13}$ | $2.59 \times 10^{-13}$ |                        | ND                              |                        |                        |
| São Paulo State, Brazil(Coelho et al., 2011)        | Rain  | 4.96 (Coelho et al., 2011)         | 7.80 (Coelho et al., 2011)    |                        | $1.63 \times 10^{-10}$ | $1.67 \times 10^{-12}$ | 1.20 (Coelho et al., 2011)       |                        | $7.57 \times 10^{-12}$ | $2.69 \times 10^{-13}$ | ND                              |                        |                        |

| Location (marine)                     | pH    | Formate ( $\mu\text{M}$ )      | Formate loss rate ( $\text{M s}^{-1}$ ) |             |                          | Oxalate ( $\mu\text{M}$ )       | Oxalate loss rate ( $\text{M s}^{-1}$ ) |             |                          | Malonate ( $\mu\text{M}$ )      | Malonate loss rate ( $\text{M s}^{-1}$ ) |                        |                          |
|---------------------------------------|-------|--------------------------------|-----------------------------------------|-------------|--------------------------|---------------------------------|-----------------------------------------|-------------|--------------------------|---------------------------------|------------------------------------------|------------------------|--------------------------|
|                                       |       |                                | bio (pH ~4)                             | bio (pH ~5) | $\text{NO}_3^-$ (marine) |                                 | bio (pH ~4)                             | bio (pH ~5) | $\text{NO}_3^-$ (marine) |                                 | bio (pH ~4)                              | bio (pH ~5)            | $\text{NO}_3^-$ (marine) |
| Puerto Rico(Gioda et al., 2011)       | Cloud | 5.5 (Gioda et al., 2011)       | 1.00 (Gioda et al., 2011)               |             |                          | 0.50 (Gioda et al., 2011)       |                                         |             |                          | ND                              |                                          |                        |                          |
| Puerto Rico(Gioda et al., 2011)       | Rain  | 5.3 (Gioda et al., 2011)       | 0.20 (Gioda et al., 2011)               |             |                          | ND                              |                                         |             |                          | ND                              |                                          |                        |                          |
| Puy de dôme(Vaitilingom et al., 2013) | Cloud | 6.1 (Vaitilingom et al., 2013) | 4.90 (Vaitilingom et al., 2013)         |             |                          | 1.00 (Vaitilingom et al., 2013) |                                         |             |                          | 0.40 (Vaitilingom et al., 2012) |                                          | $1.47 \times 10^{-12}$ | $1.55 \times 10^{-14}$   |

| Location (urban)                          | pH    | Formate ( $\mu\text{M}$ )      | Formate loss rate ( $\text{M s}^{-1}$ ) |             |                         | Oxalate ( $\mu\text{M}$ )       | Oxalate loss rate ( $\text{M s}^{-1}$ ) |             |                         | Malonate ( $\mu\text{M}$ )      | Malonate loss rate ( $\text{M s}^{-1}$ ) |                        |                         |
|-------------------------------------------|-------|--------------------------------|-----------------------------------------|-------------|-------------------------|---------------------------------|-----------------------------------------|-------------|-------------------------|---------------------------------|------------------------------------------|------------------------|-------------------------|
|                                           |       |                                | bio (pH ~4)                             | bio (pH ~5) | $\text{NO}_3^-$ (urban) |                                 | bio (pH ~4)                             | bio (pH ~5) | $\text{NO}_3^-$ (urban) |                                 | bio (pH ~4)                              | bio (pH ~5)            | $\text{NO}_3^-$ (urban) |
| Shenzhen, South China(Huang et al., 2010) | Rain  | 4.56 (Huang et al., 2010)      | 2.26 (Huang et al., 2010)               |             |                         | 0.58 (Huang et al., 2010)       |                                         |             |                         | ND                              |                                          |                        |                         |
| Anshun(Zhang et al., 2011)                | Rain  | 4.67 (Zhang et al., 2011)      | 8.77 (Zhang et al., 2011)               |             |                         | 2.84 (Zhang et al., 2011)       |                                         |             |                         | ND                              |                                          |                        |                         |
| Newark US East Coast(Song and Gao, 2009)  | Rain  | 4.6 (Song and Gao, 2009)       | 4.44 (Song and Gao, 2009)               |             |                         | 0.68 (Song and Gao, 2009)       |                                         |             |                         | 0.29(Song and Gao, 2009)        |                                          | $6.61 \times 10^{-14}$ | $2.27 \times 10^{-13}$  |
| Hong Kong SAR(Li et al., 2020)            | Cloud | 3.87 (Li et al., 2020)         | 17.10 (Li et al., 2020)                 |             |                         | 10.30 (Li et al., 2020)         |                                         |             |                         | 1.36 (Zhao et al., 2019)        |                                          | $3.10 \times 10^{-13}$ | $1.07 \times 10^{-12}$  |
| Puy de dome(Vaitilingom et al., 2013)     | Cloud | 3.9 (Vaitilingom et al., 2013) | 33.20 (Vaitilingom et al., 2013)        |             |                         | 9.30 (Vaitilingom et al., 2013) |                                         |             |                         | 3.50 (Vaitilingom et al., 2013) |                                          | $7.97 \times 10^{-13}$ | $2.74 \times 10^{-12}$  |

187 ND: No data

188 **Table S8.** Acid dissociation constants and Henry's law coefficients at 25 °C used to generate  
 189  $\varepsilon(HA(aq))$  and  $\varepsilon(H_2A(aq))$  S curves in Figure S14

| Organic acid | First acid dissociation constant ( $K_{a1}$ ) (mol L <sup>-1</sup> ) | Second acid dissociation constant ( $K_{a2}$ ) (mol L <sup>-1</sup> ) | Henry's law constant ( $H_{HA}$ or $H_{H_2A}$ ) (mol L <sup>-1</sup> atm <sup>-1</sup> ) |
|--------------|----------------------------------------------------------------------|-----------------------------------------------------------------------|------------------------------------------------------------------------------------------|
| Formic acid  | $1.78 \times 10^{-4}$<br>(Haynes, 2014)                              | Not applicable                                                        | $9.53 \times 10^3$                                                                       |
| Oxalic acid  | $5.62 \times 10^{-2}$<br>(Haynes, 2014)                              | $1.55 \times 10^{-4}$<br>(Haynes, 2014)                               | $6.11 \times 10^8$<br>(Nah et al., 2018) <sup>a</sup>                                    |
| Malonic acid | $1.48 \times 10^{-3}$<br>(Williams, 2022)                            | $2.04 \times 10^{-6}$<br>(Williams, 2022)                             | $3.85 \times 10^{10}$<br>(Compernelle and Müller, 2014)                                  |
| Maleic acid  | $1.26 \times 10^{-2}$<br>(Weast and Astle, 1981)                     | $8.51 \times 10^{-7}$<br>(Weast and Astle, 1981)                      | $1.42 \times 10^{10}$<br>(Lide and Frederikse, 1995)                                     |

190 <sup>a</sup>While we used the Henry's law coefficient provided by Nah et al. (2018), it should be noted  
 191 that the authors obtained this value by taking the average of  $H_{C_2H_2O_4}$  values provided by Clegg  
 192 et al. (1996), Compernelle and Muller (2014) and Saxena and Hildemann (1996), and  
 193 accounted for the effect of temperature using the equations provided by Sander (2015).

194

## 195 Section S1. Genome assembly, annotation, and taxonomic analysis

196 Genome assembly of the sequencing reads was performed using the NECAT pipeline  
 197 (v0.0.1\_update20200803) (Chen et al., 2021) with the default parameters. The reads were first  
 198 corrected (PREP\_OUTPUT\_COVERAGE = 40, CNS\_OUTPUT\_COVERAGE = 30,  
 199 MIN\_READ\_LENGTH = 3000) and then the corrected reads were assembled  
 200 (OVLFP\_FAST\_OPTIONS = -n 500 -z 20 -b 2000 -e 0.5 -j 0 -u 1 -a 1000,  
 201 OVLFP\_SENSITIVE\_OPTIONS = -n 500 -z 10 -e 0.5 -j 0 -u 1 -a 1000). Both the correction  
 202 and assembly steps were progressive with multiple processing steps to improve the accuracy  
 203 and completeness. The quality of the assembled genomes was evaluated using the  
 204 Benchmarking Universal Single-copy Orthologs (BUSCO v5.3.1) tool based on the database  
 205 of enterobacterales\_odb10 (Manni et al., 2021). For both strains B00910 and pf0910, complete  
 206 circular chromosomes and plasmids were obtained.

207 Genome annotation was performed using Prokka (v1.14.6) (Seemann, 2014) with the  
 208 default parameters. Whole genome-based taxonomic analysis was conducted using the Type



209 (Strain) Genome Server (TYGS) (Meier-Kolthoff and Göker, 2019). Average Nucleotide  
210 Identity (ANI) was calculated by fastANI (v1.33) (Jain et al., 2018). Metabolic pathways were  
211 analyzed using the KEGG Mapper (Kanehisa et al., 2022) and the RAST server (Aziz et al.,  
212 2008). The sequences of the two genomes have been deposited in NCBI under the BioProject  
213 number PRJNA812965.

## 214 **Section S2. Extraction of water-insoluble and water-soluble biological material and** 215 **organic compounds for UPLC-MS analysis**

216 A modified Bligh & Dyer (BD) protocol was performed to extract water-insoluble  
217 organic compounds (Sündermann et al., 2016). Briefly, 3 mL of methanol (Duskan, LC-MS  
218 grade)/chloroform (RCI, HPLC grade) (1:2, v/v) was added to a filtered 5 mL sample solution  
219 and vortexed for 5 min, after which the samples were centrifuged at 3000 rpm for 10 min at 10  
220 °C. The bottom layer was collected into a clean 2 mL centrifuge tube and dried in a concentrator  
221 using nitrogen gas. The dried extracts were redissolved in 500 µL of acetonitrile (Duskan, LC-  
222 MS grade) and stored at -20 °C prior to UPLC-MS analysis. Solid-phase extraction (SPE) was  
223 performed to remove the inorganic salts and extract the water-soluble organic compounds using  
224 hydrophobic lipophilic balanced (HLB) cartridges (Oasis HLB, 6cc 500 mg). The HLB  
225 cartridges were first preconditioned with 1 mL methanol and 2 mL Milli-Q water. A 10 mL  
226 filtered sample solution was then loaded into the SPE cartridge and washed with 20 mL Milli-  
227 Q water under vacuum at a flow rate of 5 mL/min. The elution was performed by adding 1.5  
228 mL methanol (Duskan, LC-MS grade). The eluent was evaporated to dryness under nitrogen  
229 gas and reconstituted in 500 µL acetonitrile (Duskan, LC-MS grade).

## 230 **Section S3. UPLC-MS operation, data processing, and statistical analysis**

231 Chromatographic separation was performed on a Kinetex HILIC LC column (100 × 2.1  
232 mm, 2.6 µm, 100 Å, Phenomenex). The flow rate was fixed at 0.3 mL/min with ultra-pure  
233 water containing 5 mM ammonium acetate (Fisher, LC-MS grade) as mobile phase A and  
234 acetonitrile (Duskan, LC-MS grade) for mobile phase B. The following gradient program was  
235 used: 0 to 2 min 95% A; 2 to 4 min linear gradient to 80% B; 4 to 11 min linear gradient to

236 65% B; 11 to 12.5 min 65% B; 12.5 to 13 min linear gradient to 95% B; 13 to 15 min  
237 equilibration wash with 95% B. Injection volume was set at 10  $\mu$ L. The information dependent  
238 analysis (IDA) acquisition was acquired with MS scan (100 to 1200 m/z) followed by MS/MS  
239 scan (50 to 1200 m/z) in positive ion mode. The following MS conditions were used: 30 PSI  
240 curtain gas, 60 PSI ion source gas, 3000 V ESI ion spray voltage, 320  $^{\circ}$ C source temperature,  
241 10 V collision energy for MS, and 80 V declustering potential. MS/MS was acquired with a  
242 collision energy was 20 V with 5 V spread. The raw MS data was processed for peak detection,  
243 retention time correction, alignment, and integration using the XCMS software built into the  
244 web-based Galaxy platform (<https://umsa.cerit-sc.cz/>) (Gowda et al., 2014). The processed data  
245 was then uploaded to MetaboAnalyst 5.0 (<https://www.metaboanalyst.ca/>) (Pang et al., 2021)  
246 to identify cellular compounds that had prominent ion intensities.

247 The raw UPLC-MS data first underwent preprocessing, normalization, and quality  
248 control steps using the XCMS software built into the web-based Galaxy platform (available at:  
249 <https://umsa.cerit-sc.cz/>). The raw data was processed for peak detection, alignment, and  
250 framing. This generated a table that displayed the retention time, mass-to-charge ratio (m/z),  
251 and the intensity/peak area for each peak. The quality control step was performed to assess the  
252 stability of the intensities of peaks (“features”) between samples. This was performed using  
253 quality control samples, which were mixtures of equal amounts of experimental samples taken  
254 at each time point of the experiment. The relative standard deviation (RSD) of each feature in  
255 the quality control sample was compared to those in the experimental samples. Features with  
256 higher RSD in the quality control sample than in the experimental samples were excluded,  
257 while features with  $RSD < 30\%$  were retained for further analysis. Multivariable statistical  
258 analysis was performed on the retained features using principal component analysis (PCA) with  
259 95% confidence ellipse and partial least squares discrimination analysis (PLS-DA) to identify  
260 potential discriminations between the experimental samples. Heatmaps were generated to  
261 determine how the retained features changed at different time points during the experiment. A  
262 selection of discriminant ions and buckets was done based on the variable importance in  
263 projection (VIP) values. Features with VIP values greater than 1.0 were used for the  
264 identification step. MS/MS analysis was performed for the structural identification of

265 compounds. The structure of each compound was deduced based on its adducts, isotopes, and  
266 MS/MS fragments using the SCIEX OS-Q software (AB Sciex). Information about  
267 compounds' chemical structures, m/z, and retention times were subsequently uploaded to  
268 MetaboAnalyst 5.0 (<https://www.metaboanalyst.ca/>), which used this information to identify  
269 the compounds.

## 270 **Section S4. IC operation**

271 Organic acid concentrations were measured using a Dionex ICS-1100 (ThermoFisher  
272 Scientific) system. Separation was achieved using a Dionex IonPac AS18 (4 × 250 mm) anion  
273 exchange column (Thermo Scientific) equipped with a Dionex IonPac AG18 (4 × 50 mm)  
274 guard column (Thermo Scientific). 16 mM potassium hydroxide (Fisher, ≥85%) was used as  
275 the mobile phase at a flow rate of 1.0 mL/min for a 30 min run time. Each aliquot of solution  
276 was passed through a syringe filter before IC analysis.

## 277 **Section S5. Estimation of biodegradation and chemical reaction rates (M s<sup>-1</sup>) in cloud 278 water**

### 279 **S5.1. Biodegradation**

280 The decay in the concentration of a specific organic acid as a function of time (0 to 12  
281 hours) during a biodegradation experiment can be described by the following equation:

$$282 \frac{d[Acid]}{dt} = k'_{cell} \times [Acid] = k_{cell,acid} \times [cell]_{experiment} \times [Acid]_{experiment}$$

283 where  $k'_{cell}$  (s<sup>-1</sup>) is the pseudo first order rate constant obtained from fitting the decay of the  
284 organic acid, and  $[Acid]_{experiment}$  (mol L<sup>-1</sup>) is the initial concentration of the organic acid  
285 used in the biodegradation experiment.  $k'_{cell}$  is the product of the concentration of bacteria cells  
286 used in the experiment ( $[cell]_{experiment}$ , cell L<sup>-1</sup>) and the biodegradation rate constant  
287 ( $k_{cell,acid}$ , L cell<sup>-1</sup>s<sup>-1</sup>).

288 The loss rate of the organic acid in cloud water resulting from biodegradation is:

$$289 \frac{d[Acid]_{cloud}}{dt} = k_{cell,acid} \times [cell]_{cloud} \times [Acid]_{cloud}$$

290 where  $[cell]_{cloud}$  ( $cell L^{-1}$ ) is the concentration of bacteria cells present in cloud water, and  
 291  $[Acid]_{cloud}$  ( $mol L^{-1}$ ) is the concentration of the organic in cloud water.

## 292 **S5.2. Chemical reactions**

293 The loss rates of the organic acid in cloud water resulting from reactions with  $\cdot OH$  and  
 294  $NO_3\cdot$  are:

$$295 \frac{d[Acid]_{cloud}}{dt} = k_{OH,acid} \times [\cdot OH]_{cloud} \times [Acid]_{cloud}$$

$$296 \frac{d[Acid]_{cloud}}{dt} = k_{NO_3,acid} \times [NO_3\cdot]_{cloud} \times [Acid]_{cloud}$$

297 where  $k_{OH,acid}$  ( $L mol^{-1}s^{-1}$ ) and  $k_{NO_3,acid}$  ( $L mol^{-1}s^{-1}$ ) are the rate constants for the  
 298 reactions of the organic acid with  $\cdot OH$  and  $NO_3\cdot$ , respectively, and  $[\cdot OH]_{cloud}$  ( $mol L^{-1}$ ) and  
 299  $[NO_3\cdot]_{cloud}$  ( $mol L^{-1}$ ) are the concentrations of  $\cdot OH$  and  $NO_3\cdot$  in cloud water, respectively.

## 300 **Section S6. Gas-aqueous phase partitioning of monocarboxylic and dicarboxylic acids**

301 Meskhidze et al. (2003) and Guo et al. (2016) previously introduced the concept of “S  
 302 curves”, which describe how the pH of the aqueous phase affects the gas-aqueous partitioning  
 303 of acidic and basic species. It is assumed that the equilibrium between gas and aqueous phases  
 304 involves the dissolution of the acidic/basic species into the aqueous phase, followed by the  
 305 dissociation of the dissolved species. Assuming unity activity coefficients, for monocarboxylic  
 306 acids (HA, e.g., formic acid), the pH-dependence of the molar fraction of HA in the aqueous  
 307 phase ( $\varepsilon(HA(aq))$ ) is described by the following equation (Nah et al., 2018):

$$308 \varepsilon(HA(aq)) = \frac{H_{HA}WRT(10^{-pH} + K_{a1}) \times 0.987 \times 10^{-14}}{10^{-pH} + H_{HA}WRT(10^{-pH} + K_{a1}) \times 0.987 \times 10^{-14}}$$

309 where  $W$  is liquid water concentration ( $\mu g m^{-3}$ ),  $H_{HA}$  ( $mole L^{-1} atm^{-1}$ ) is the Henry’s law  
 310 constants for monocarboxylic acid,  $K_{a1}$  ( $mole L^{-1}$ ) is the first acid dissociation constant,  $R$  is  
 311 the gas constant ( $8.314 m^3 Pa K^{-1} mol^{-1}$ ), and  $T$  is temperature (K). The complete derivation for  
 312  $\varepsilon(HA(aq))$  can be found in the SI of Guo et al. (2015).

313 Assuming unity activity coefficients, for dicarboxylic acids ( $H_2A$ , e.g., oxalic acid,

314 malonic acid, and maleic acid), the pH-dependence of the molar fraction of H<sub>2</sub>A in the aqueous  
315 phase ( $\varepsilon(H_2A(aq))$ ) can eventually be simplified to the following equation (Nah et al., 2018):

$$316 \quad \varepsilon(H_2A(aq)) \cong \frac{H_{H_2A} W R T (10^{-pH} + K_{a1}) \times 0.987 \times 10^{-14}}{10^{-pH} + H_{H_2A} W R T (10^{-pH} + K_{a1}) \times 0.987 \times 10^{-14}}$$

317 where  $W$  is liquid water concentration ( $\mu\text{g m}^{-3}$ ),  $H_{H_2A}$  (mole L<sup>-1</sup> atm<sup>-1</sup>) is the Henry's law  
318 constants for monocarboxylic acid,  $K_{a1}$  (mole L<sup>-1</sup>) is the first acid dissociation constant,  $R$  is  
319 the gas constant (8.314 m<sup>3</sup> Pa K<sup>-1</sup> mol<sup>-1</sup>), and  $T$  is temperature (K). The complete derivation for  
320  $\varepsilon(H_2A(aq))$  can be found in the SI of Nah et al. (2018), which also includes discussions of the  
321 assumptions made during the derivation process which will lead to the disappearance of the  
322 second acid dissociation constant ( $K_{a2}$ ) term during the process of simplifying the equation.

323

## 324 **References**

325 Amato, P., Ménager, M., Sancelme, M., Laj, P., Mailhot, G., and Delort, A.-M.: Microbial  
326 population in cloud water at the Puy de Dôme: Implications for the chemistry of clouds,  
327 Atmospheric Environment, 39, 4143-4153, <https://doi.org/10.1016/j.atmosenv.2005.04.002>,  
328 2005.

329 Amato, P., Joly, M., Besaury, L., Oudart, A., Taib, N., Mone, A. I., Deguillaume, L., Delort, A.  
330 M., and Debross, D.: Active microorganisms thrive among extremely diverse communities in  
331 cloud water, PLoS One, 12, e0182869, 10.1371/journal.pone.0182869, 2017.

332 Anglada, J. M., Martins-Costa, M., Francisco, J. S., and Ruiz-Lopez, M. F.: Interconnection of  
333 reactive oxygen species chemistry across the interfaces of atmospheric, environmental, and  
334 biological processes, Accounts of chemical research, 48, 575-583,  
335 <https://doi.org/10.1021/ar500412p>, 2015.

336 Ariya, P. A., Nepotchatykh, O., Ignatova, O., and Amyot, M.: Microbiological degradation of  
337 atmospheric organic compounds, Geophysical Research Letters, 29, 34-31-34-34,  
338 10.1029/2002gl015637, 2002.

339 Attard, E., Yang, H., Delort, A. M., Amato, P., Pöschl, U., Glaux, C., Koop, T., and Morris, C.  
340 E.: Effects of atmospheric conditions on ice nucleation activity of Pseudomonas, Atmospheric  
341 Chemistry and Physics, 12, 10667-10677, <https://doi.org/10.5194/acp-12-10667-2012>, 2012.

342 Aziz, R. K., Bartels, D., Best, A. A., DeJongh, M., Disz, T., Edwards, R. A., Formsma, K.,  
343 Gerdes, S., Glass, E. M., and Kubal, M.: The RAST Server: rapid annotations using subsystems

344 technology, BMC genomics, 9, 1-15, <https://doi.org/10.1186/1471-2164-9-75>, 2008.

345 Bauer, H., Kasper-Giebl, A., Loflund, M., Giebl, H., Hitzengerger, R., Zibuschka, F., and  
346 Puxbaum, H.: The contribution of bacteria and fungal spores to the organic carbon content of  
347 cloud water, precipitation and aerosols, Atmospheric Research, 64, 109-119,  
348 [https://doi.org/10.1016/s0169-8095\(02\)00084-4](https://doi.org/10.1016/s0169-8095(02)00084-4), 2002.

349 Bearson, S., Bearson, B., and Foster, J. W.: Acid stress responses in enterobacteria, Fems  
350 Microbiology Letters, 147, 173-180, <https://doi.org/10.1111/j.1574-6968.1997.tb10238.x>,  
351 1997.

352 Bianco, A., Voyard, G., Deguillaume, L., Mailhot, G., and Brigante, M.: Improving the  
353 characterization of dissolved organic carbon in cloud water: Amino acids and their impact on  
354 the oxidant capacity, Sci Rep, 6, 37420, 10.1038/srep37420, 2016.

355 Bianco, A., Deguillaume, L., Chaumerliac, N., Vaitilingom, M., Wang, M., Delort, A. M., and  
356 Bridoux, M. C.: Effect of endogenous microbiota on the molecular composition of cloud water:  
357 a study by Fourier-transform ion cyclotron resonance mass spectrometry (FT-ICR MS), Sci  
358 Rep, 9, 7663, 10.1038/s41598-019-44149-8, 2019.

359 Bianco, A., Deguillaume, L., Vaitilingom, M., Nicol, E., Baray, J. L., Chaumerliac, N., and  
360 Bridoux, M.: Molecular Characterization of Cloud Water Samples Collected at the Puy de  
361 Dome (France) by Fourier Transform Ion Cyclotron Resonance Mass Spectrometry,  
362 Environmental Science & Technology, 52, 10275-10285,  
363 <https://doi.org/10.1021/acs.est.8b01964>, 2018.

364 Burrows, S. M., Elbert, W., Lawrence, M. G., and Poschl, U.: Bacteria in the global atmosphere  
365 - Part 1: Review and synthesis of literature data for different ecosystems, Atmospheric  
366 Chemistry and Physics, 9, 9263-9280, <https://doi.org/10.5194/acp-9-9263-2009>, 2009.

367 Chen, X., Ran, P., Ho, K., Lu, W., Li, B., Gu, Z., Song, C., and Wang, J.: Concentrations and  
368 Size Distributions of Airborne Microorganisms in Guangzhou during Summer, Aerosol and Air  
369 Quality Research, 12, 1336-1344, <https://doi.org/10.4209/aaqr.2012.03.0066>, 2012.

370 Chen, Y., Nie, F., Xie, S.-Q., Zheng, Y.-F., Dai, Q., Bray, T., Wang, Y.-X., Xing, J.-F., Huang,  
371 Z.-J., and Wang, D.-P.: Efficient assembly of nanopore reads via highly accurate and intact  
372 error correction, Nature Communications, 12, 1-10, [https://doi.org/10.1038/s41467-020-  
373 20236-7](https://doi.org/10.1038/s41467-020-20236-7), 2021.

374 Clegg, S. L., Brimblecombe, P., and Khan, L.: The Henry's law constant of oxalic acid and its  
375 partitioning into the atmospheric aerosol, Idojaras, 100, 51-68, 1996.

376 Coelho, C. H., Allen, A. G., Fornaro, A., Orlando, E. A., Grigoletto, T. L., and Campos, M. L.  
377 A.: Wet deposition of major ions in a rural area impacted by biomass burning emissions,  
378 Atmospheric environment, 45, 5260-5265, <https://doi.org/10.1016/j.atmosenv.2011.06.063>,  
379 2011.

380 Compernelle, S. and Müller, J. F.: Henry's law constants of diacids and hydroxy polyacids:  
381 recommended values, *Atmos. Chem. Phys.*, 14, 2699-2712, [https://doi.org/10.5194/acp-14-](https://doi.org/10.5194/acp-14-2699-2014)  
382 [2699-2014](https://doi.org/10.5194/acp-14-2699-2014), 2014.

383 Davey, M. E. and O'toole, G. A.: Microbial biofilms: from ecology to molecular genetics,  
384 *Microbiology and molecular biology reviews*, 64, 847-867,  
385 <https://doi.org/10.1128/MMBR.64.4.847-867.2000>, 2000.

386 Delort, A.-M., Vaïtilingom, M., Amato, P., Sancelme, M., Parazols, M., Mailhot, G., Laj, P.,  
387 and Deguillaume, L.: A short overview of the microbial population in clouds: Potential roles in  
388 atmospheric chemistry and nucleation processes, *Atmospheric Research*, 98, 249-260,  
389 [10.1016/j.atmosres.2010.07.004](https://doi.org/10.1016/j.atmosres.2010.07.004), 2010.

390 Després, V., Huffman, J. A., Burrows, S. M., Hoose, C., Safatov, A., Buryak, G., Fröhlich-  
391 Nowoisky, J., Elbert, W., Andreae, M., Pöschl, U., and Jaenicke, R.: Primary biological aerosol  
392 particles in the atmosphere: a review, *Tellus B: Chemical and Physical Meteorology*, 64,  
393 <https://doi.org/10.3402/tellusb.v64i0.15598>, 2012.

394 Ding, W., Li, L., Han, Y., Liu, J., and Liu, J.: Site-related and seasonal variation of bioaerosol  
395 emission in an indoor wastewater treatment station: level, characteristics of particle size, and  
396 microbial structure, *Aerobiologia*, 32, 211-224, <https://doi.org/10.1007/s10453-015-9391-5>,  
397 2015.

398 Ervens, B. and Amato, P.: The global impact of bacterial processes on carbon mass,  
399 *Atmospheric Chemistry and Physics*, 20, 1777-1794, [https://doi.org/10.5194/acp-20-1777-](https://doi.org/10.5194/acp-20-1777-2020)  
400 [2020](https://doi.org/10.5194/acp-20-1777-2020), 2020.

401 Ervens, B., Gligorovski, S., and Herrmann, H.: Temperature-dependent rate constants for  
402 hydroxyl radical reactions with organic compounds in aqueous solutions, *Physical Chemistry*  
403 *Chemical Physics*, 5, 1811-1824, <https://doi.org/10.1039/B300072A>, 2003.

404 Ervens, B., Turpin, B. J., and Weber, R. J.: Secondary organic aerosol formation in cloud  
405 droplets and aqueous particles (aqSOA): a review of laboratory, field and model studies, *Atmos.*  
406 *Chem. Phys.*, 11, 11069-11102, [10.5194/acp-11-11069-2011](https://doi.org/10.5194/acp-11-11069-2011), 2011.

407 Fankhauser, A. M., Antonio, D. D., Krell, A., Alston, S. J., Banta, S., and McNeill, V. F.:  
408 Constraining the Impact of Bacteria on the Aqueous Atmospheric Chemistry of Small Organic  
409 Compounds, *ACS Earth and Space Chemistry*, 3, 1485-1491,  
410 [10.1021/acsearthspacechem.9b00054](https://doi.org/10.1021/acsearthspacechem.9b00054), 2019.

411 Flemming, H. C. and Wingender, J.: The biofilm matrix, *Nature Reviews Microbiology*, 8, 623-  
412 633, <https://doi.org/10.1038/nrmicro2415>, 2010.

413 George, K. M., Ruthenburg, T. C., Smith, J., Yu, L., Zhang, Q., Anastasio, C., and Dillner, A.  
414 M.: FT-IR quantification of the carbonyl functional group in aqueous-phase secondary organic  
415 aerosol from phenols, *Atmospheric Environment*, 100, 230-237,  
416 <https://doi.org/10.1016/j.atmosenv.2014.11.011>, 2015.

417 Gioda, A., Reyes-Rodriguez, G. J., Santos-Figueroa, G., Collett, J. L., Decesari, S., Ramos, M.,  
418 Netto, H., Neto, F. R. D., and Mayol-Bracero, O. L.: Speciation of water-soluble inorganic,  
419 organic, and total nitrogen in a background marine environment: Cloud water, rainwater, and  
420 aerosol particles, *Journal of Geophysical Research-Atmospheres*, 116,  
421 <https://doi.org/10.1029/2010jd015010>, 2011.

422 Gowda, H., Ivanisevic, J., Johnson, C. H., Kurczy, M. E., Benton, H. P., Rinehart, D., Nguyen,  
423 T., Ray, J., Kuehl, J., Arevalo, B., Westenskow, P. D., Wang, J., Arkin, A. P., Deutschbauer, A.  
424 M., Patti, G. J., and Siuzdak, G.: Interactive XCMS Online: simplifying advanced metabolomic  
425 data processing and subsequent statistical analyses, *Anal Chem*, 86, 6931-6939,  
426 <https://doi.org/10.1021/ac500734c>, 2014.

427 Guan, N. and Liu, L.: Microbial response to acid stress: mechanisms and applications, *Applied*  
428 *Microbiology and Biotechnology*, 104, 51-65, <https://doi.org/10.1007/s00253-019-10226-1>,  
429 2020.

430 Guo, H., Liu, J., Froyd, K. D., Roberts, J. M., Veres, P. R., Hayes, P. L., Jimenez, J. L., Nenes,  
431 A., and Weber, R. J.: Fine particle pH and gas-particle phase partitioning of inorganic species  
432 in Pasadena, California, during the 2010 CalNex campaign, *Atmos. Chem. Phys.*, 17, 5703-  
433 5719, <https://doi.org/10.5194/acp-17-5703-2017>, 2017.

434 Guo, H., Sullivan, A. P., Campuzano-Jost, P., Schroder, J. C., Lopez-Hilfiker, F. D., Dibb, J. E.,  
435 Jimenez, J. L., Thornton, J. A., Brown, S. S., Nenes, A., and Weber, R. J.: Fine particle pH and  
436 the partitioning of nitric acid during winter in the northeastern United States, *Journal of*  
437 *Geophysical Research: Atmospheres*, 121, 10,355-310,376,  
438 <https://doi.org/10.1002/2016JD025311>, 2016.

439 Haynes, W. M.: CRC handbook of chemistry and physics, CRC Press, Boca Raton, Florida 2014.

440 Herrmann, H., Hoffmann, D., Schaefer, T., Brauer, P., and Tilgner, A.: Tropospheric aqueous-  
441 phase free-radical chemistry: radical sources, spectra, reaction kinetics and prediction tools,  
442 *Chemphyschem*, 11, 3796-3822, <https://doi.org/10.1002/cphc.201000533>, 2010.

443 Hu, W., Niu, H. Y., Murata, K., Wu, Z. J., Hu, M., Kojima, T., and Zhang, D. Z.: Bacteria in  
444 atmospheric waters: Detection, characteristics and implications, *Atmospheric Environment*,  
445 179, 201-221, <https://doi.org/10.1016/j.atmosenv.2018.02.026>, 2018.

446 Huang, D. D., Zhang, Q., Cheung, H. H. Y., Yu, L., Zhou, S., Anastasio, C., Smith, J. D., and  
447 Chan, C. K.: Formation and Evolution of aqSOA from Aqueous-Phase Reactions of Phenolic  
448 Carbonyls: Comparison between Ammonium Sulfate and Ammonium Nitrate Solutions,  
449 *Environmental Science & Technology*, 52, 9215-9224, <https://doi.org/10.1021/acs.est.8b03441>,  
450 2018.

451 Huang, S., Hu, W., Chen, J., Wu, Z., Zhang, D., and Fu, P.: Overview of biological ice  
452 nucleating particles in the atmosphere, *Environment International*, 146, 106197,  
453 <https://doi.org/10.1016/j.envint.2020.106197>, 2021.



454 Huang, X.-F., Li, X., He, L.-Y., Feng, N., Hu, M., Niu, Y.-W., and Zeng, L.-W.: 5-Year study  
455 of rainwater chemistry in a coastal mega-city in South China, *Atmospheric Research*, 97, 185-  
456 193, <https://doi.org/10.1016/j.atmosres.2010.03.027>, 2010.

457 Husárová, S., Vařtilingom, M., Deguillaume, L., Traikia, M., Vinatier, V., Sancelme, M., Amato,  
458 P., Matulová, M., and Delort, A.-M.: Biotransformation of methanol and formaldehyde by  
459 bacteria isolated from clouds. Comparison with radical chemistry, *Atmospheric Environment*,  
460 45, 6093-6102, 10.1016/j.atmosenv.2011.06.035, 2011.

461 Jaber, S., Joly, M., Brissy, M., Leremboure, M., Khaled, A., Ervens, B., and Delort, A.-M.:  
462 Biotic and abiotic transformation of amino acids in cloud water: experimental studies and  
463 atmospheric implications, *Biogeosciences*, 18, 1067-1080, 10.5194/bg-18-1067-2021, 2021.

464 Jaber, S., Lallement, A., Sancelme, M., Leremboure, M., Mailhot, G., Ervens, B., and Delort,  
465 A.-M.: Biodegradation of phenol and catechol in cloud water: comparison to chemical  
466 oxidation in the atmospheric multiphase system, *Atmospheric Chemistry and Physics*, 20,  
467 4987-4997, 10.5194/acp-20-4987-2020, 2020.

468 Jaenicke, R.: Abundance of cellular material and proteins in the atmosphere, *Science*, 308, 73-  
469 73, <https://doi.org/10.1126/science.1106335>, 2005.

470 Jain, C., Rodriguez-R, L. M., Phillippy, A. M., Konstantinidis, K. T., and Aluru, S.: High  
471 throughput ANI analysis of 90K prokaryotic genomes reveals clear species boundaries, *Nature*  
472 *communications*, 9, 1-8, <https://doi.org/10.1038/s41467-018-07641-9>, 2018.

473 Joly, M., Amato, P., Sancelme, M., Vinatier, V., Abrantes, M., Deguillaume, L., and Delort, A.-  
474 M.: Survival of microbial isolates from clouds toward simulated atmospheric stress factors,  
475 *Atmospheric Environment*, 117, 92-98, <https://doi.org/10.1016/j.atmosenv.2015.07.009>, 2015.

476 Kanehisa, M., Sato, Y., and Kawashima, M.: KEGG mapping tools for uncovering hidden  
477 features in biological data, *Protein Science*, 31, 47-53, <https://doi.org/10.1002/pro.4172>, 2022.

478 Koutny, M., Sancelme, M., Dabin, C., Pichon, N., Delort, A.-M., and Lemaire, J.: Acquired  
479 biodegradability of polyethylenes containing pro-oxidant additives, *Polymer Degradation and*  
480 *Stability*, 91, 1495-1503, 10.1016/j.polymdegradstab.2005.10.007, 2006.

481 Laszakovits, J. R. and MacKay, A. A.: Data-Based Chemical Class Regions for Van Krevelen  
482 Diagrams, *Journal of the American Society for Mass Spectrometry*, 33, 198-202,  
483 <https://doi.org/10.1021/jasms.1c00230>, 2022.

484 Li, T., Wang, Z., Wang, Y., Wu, C., Liang, Y., Xia, M., Yu, C., Yun, H., Wang, W., Wang, Y.,  
485 Guo, J., Herrmann, H., and Wang, T.: Chemical characteristics of cloud water and the impacts  
486 on aerosol properties at a subtropical mountain site in Hong Kong SAR, *Atmospheric*  
487 *Chemistry and Physics*, 20, 391-407, <https://doi.org/10.5194/acp-20-391-2020>, 2020.

488 Lide, D. R. and Frederikse, H. P. R.: CRC handbook of chemistry and physics, Boca Raton,  
489 Florida 1995.

490 Löflund, M., Kasper-Giebl, A., Schuster, B., Giebl, H., Hitzenberger, R., and Puxbaum, H.:  
491 Formic, acetic, oxalic, malonic and succinic acid concentrations and their contribution to  
492 organic carbon in cloud water, *Atmospheric Environment*, 36, 1553-1558,  
493 [https://doi.org/10.1016/S1352-2310\(01\)00573-8](https://doi.org/10.1016/S1352-2310(01)00573-8), 2002.

494 Lund, P., Tramonti, A., and De Biase, D.: Coping with low pH: molecular strategies in  
495 neutralophilic bacteria, *FEMS Microbiology Reviews*, 38, 1091-1125,  
496 <https://doi.org/10.1111/1574-6976.12076>, 2014.

497 Makuc, J., Paiva, S., Schauen, M., Krämer, R., André, B., Casal, M., Leão, C., and Boles, E.:  
498 The putative monocarboxylate permeases of the yeast *Saccharomyces cerevisiae* do not  
499 transport monocarboxylic acids across the plasma membrane, *Yeast*, 18, 1131-1143, 2001.

500 Manni, M., Berkeley, M. R., Seppey, M., and Zdobnov, E. M.: BUSCO: assessing genomic  
501 data quality and beyond, *Current Protocols*, 1, e323, <https://doi.org/10.1002/cpz1.323>, 2021.

502 Matulova, M., Husarova, S., Capek, P., Sancelme, M., and Delort, A. M.: Biotransformation of  
503 various saccharides and production of exopolymeric substances by cloud-borne *Bacillus* sp.  
504 3B6, *Environ Sci Technol*, 48, 14238-14247, 10.1021/es501350s, 2014.

505 Meier-Kolthoff, J. P. and Göker, M.: TYGS is an automated high-throughput platform for state-  
506 of-the-art genome-based taxonomy, *Nature communications*, 10, 1-10,  
507 <https://doi.org/10.1038/s41467-019-10210-3>, 2019.

508 Meskhidze, N., Chameides, W. L., Nenes, A., and Chen, G.: Iron mobilization in mineral dust:  
509 Can anthropogenic SO<sub>2</sub> emissions affect ocean productivity?, *Geophysical Research Letters*,  
510 30, <https://doi.org/10.1029/2003GL018035>, 2003.

511 Misovich, M. V., Hettiyadura, A. P. S., Jiang, W. Q., Zhang, Q., and Laskin, A.: Molecular-  
512 Level Study of the Photo-Oxidation of Aqueous-Phase Guaiacyl Acetone in the Presence of C-  
513 3\*: Formation of Brown Carbon Products, *Acs Earth and Space Chemistry*, 5, 1983-1996,  
514 <https://doi.org/10.1021/acsearthspacechem.1c00103>, 2021.

515 Möhler, O., DeMott, P., Vali, G., and Levin, Z.: Microbiology and atmospheric processes: the  
516 role of biological particles in cloud physics, *Biogeosciences*, 4, 1059-1071,  
517 <https://doi.org/10.5194/bg-4-1059-2007>, 2007.

518 Morris, C. E., Soubeyrand, S., Bigg, E. K., Creamean, J. M., and Sands, D. C.: Mapping  
519 Rainfall Feedback to Reveal the Potential Sensitivity of Precipitation to Biological Aerosols,  
520 *Bulletin of the American Meteorological Society*, 98, 1109-1118,  
521 <https://doi.org/10.1175/BAMS-D-15-00293.1>, 2017.

522 Morris, C. E., Conen, F., Alex Huffman, J., Phillips, V., Pöschl, U., and Sands, D. C.:  
523 Bioprecipitation: a feedback cycle linking earth history, ecosystem dynamics and land use  
524 through biological ice nucleators in the atmosphere, *Glob Chang Biol*, 20, 341-351,  
525 <https://doi.org/10.1111/gcb.12447>, 2014.

526 Nah, T., Guo, H., Sullivan, A. P., Chen, Y., Tanner, D. J., Nenes, A., Russell, A., Ng, N. L.,  
527 Huey, L. G., and Weber, R. J.: Characterization of aerosol composition, aerosol acidity, and  
528 organic acid partitioning at an agriculturally intensive rural southeastern US site, *Atmos. Chem.*  
529 *Phys.*, 18, 11471-11491, <https://doi.org/10.5194/acp-18-11471-2018>, 2018.

530 Pang, Z., Chong, J., Zhou, G., de Lima Morais, D. A., Chang, L., Barrette, M., Gauthier, C.,  
531 Jacques, P. E., Li, S., and Xia, J.: MetaboAnalyst 5.0: narrowing the gap between raw spectra  
532 and functional insights, *Nucleic Acids Res.*, 49, W388-W396,  
533 <https://doi.org/10.1093/nar/gkab382>, 2021.

534 Peng, J., Zhou, S., Xiao, K., Zeng, J., Yao, C., Lu, S., Zhang, W., Fu, Y., Yang, Y., and Bi, X.:  
535 Diversity of bacteria in cloud water collected at a National Atmospheric Monitoring Station in  
536 Southern China, *Atmospheric Research*, 218, 176-182,  
537 <https://doi.org/10.1016/j.atmosres.2018.12.004>, 2019.

538 Prokof'eva, T. V., Shoba, S. A., Lysak, L. V., Ivanova, A. E., Glushakova, A. M., Shishkov, V.  
539 A., Lapygina, E. V., Shilaika, P. D., and Glebova, A. A.: Organic Constituents and Biota in the  
540 Urban Atmospheric Solid Aerosol: Potential Effects on Urban Soils, *Eurasian Soil Science*, 54,  
541 1532-1545, <https://doi.org/10.1134/S1064229321100094>, 2021.

542 Pye, H. O., Nenes, A., Alexander, B., Ault, A. P., Barth, M. C., Clegg, S. L., Collett Jr, J. L.,  
543 Fahey, K. M., Hennigan, C. J., and Herrmann, H.: The acidity of atmospheric particles and  
544 clouds, *Atmospheric chemistry and physics*, 20, 4809-4888, <https://doi.org/10.5194/acp-20-4809-2020>, 2020.

546 Qu, R. and Han, G.: A critical review of the variation in rainwater acidity in 24 Chinese cities  
547 during 1982–2018, *Elementa: Science of the Anthropocene*, 9,  
548 <https://doi.org/10.1525/elementa.2021.00142>, 2021.

549 Rivas-Ubach, A., Liu, Y., Bianchi, T. S., Tolic, N., Jansson, C., and Pasa-Tolic, L.: Moving  
550 beyond the van Krevelen diagram: A new stoichiometric approach for compound classification  
551 in organisms, *Analytical chemistry*, 90, 6152-6160, 2018.

552 Romano, S., Fragola, M., Alifano, P., Perrone, M. R., and Talà, A.: Potential Human and Plant  
553 Pathogenic Species in Airborne PM10 Samples and Relationships with Chemical Components  
554 and Meteorological Parameters, *Atmosphere*, 12, 654, <https://doi.org/10.3390/atmos12050654>,  
555 2021.

556 Romano, S., Di Salvo, M., Rispoli, G., Alifano, P., Perrone, M. R., and Tala, A.: Airborne  
557 bacteria in the Central Mediterranean: Structure and role of meteorology and air mass transport,  
558 *Sci Total Environ.*, 697, 134020, <https://doi.org/10.1016/j.scitotenv.2019.134020>, 2019.

559 Ruiz-Gil, T., Acuña, J. J., Fujiyoshi, S., Tanaka, D., Noda, J., Maruyama, F., and Jorquera, M.  
560 A.: Airborne bacterial communities of outdoor environments and their associated influencing  
561 factors, *Environment International*, 145, 106156, <https://doi.org/10.1016/j.envint.2020.106156>,  
562 2020.

563 Sander, R.: Compilation of Henry's law constants (version 4.0) for water as solvent, Atmos.  
564 Chem. Phys., 15, 4399-4981, <https://doi.org/10.5194/acp-15-4399-2015>, 2015.

565 Saxena, P. and Hildemann, L. M.: Water-soluble organics in atmospheric particles: A critical  
566 review of the literature and application of thermodynamics to identify candidate compounds,  
567 Journal of Atmospheric Chemistry, 24, 57-109, <https://doi.org/10.1007/BF00053823>, 1996.

568 Seemann, T.: Prokka: rapid prokaryotic genome annotation, Bioinformatics, 30, 2068-2069,  
569 <https://doi.org/10.1093/bioinformatics/btu153>, 2014.

570 Shah, V., Jacob, D. J., Moch, J. M., Wang, X., and Zhai, S.: Global modeling of cloud water  
571 acidity, precipitation acidity, and acid inputs to ecosystems, Atmos. Chem. Phys., 20, 12223-  
572 12245, <https://doi.org/10.5194/acp-20-12223-2020>, 2020.

573 Song, F. and Gao, Y.: Chemical characteristics of precipitation at metropolitan Newark in the  
574 US East Coast, Atmospheric Environment, 43, 4903-4913,  
575 <https://doi.org/10.1016/j.atmosenv.2009.07.024>, 2009.

576 Sun, X., Wang, Y., Li, H., Yang, X., Sun, L., Wang, X., Wang, T., and Wang, W.: Organic acids  
577 in cloud water and rainwater at a mountain site in acid rain areas of South China, Environ Sci  
578 Pollut Res Int, 23, 9529-9539, 10.1007/s11356-016-6038-1, 2016.

579 Sündermann, A., Eggers, L. F., and Schwudke, D.: Liquid Extraction: Bligh and Dyer, in:  
580 Encyclopedia of Lipidomics, 1-4, [https://doi.org/10.1007/978-94-007-7864-1\\_88-1](https://doi.org/10.1007/978-94-007-7864-1_88-1), 2016.

581 Tilgner, A., Schaefer, T., Alexander, B., Barth, M., Collett Jr, J. L., Fahey, K. M., Nenes, A.,  
582 Pye, H. O., Herrmann, H., and McNeill, V. F.: Acidity and the multiphase chemistry of  
583 atmospheric aqueous particles and clouds, Atmospheric Chemistry and Physics, 21, 13483-  
584 13536, 2021.

585 Tsai, Y. I. and Kuo, S.-C.: Contributions of low molecular weight carboxylic acids to aerosols  
586 and wet deposition in a natural subtropical broad-leaved forest environment, Atmospheric  
587 Environment, 81, 270-279, <https://doi.org/10.1016/j.atmosenv.2013.08.061>, 2013.

588 Tyagi, P., Ishimura, Y., and Kawamura, K.: Hydroxy fatty acids in marine aerosols as microbial  
589 tracers: 4-year study on  $\beta$ - and  $\omega$ -hydroxy fatty acids from remote Chichijima Island in the  
590 western North Pacific, Atmospheric Environment, 115, 89-100, 2015.

591 Vaitilingom, M., Amato, P., Sancelme, M., Laj, P., Leriche, M., and Delort, A. M.: Contribution  
592 of microbial activity to carbon chemistry in clouds, Appl Environ Microbiol, 76, 23-29,  
593 10.1128/AEM.01127-09, 2010.

594 Vaitilingom, M., Deguillaume, L., Vinatier, V., Sancelme, M., Amato, P., Chaumerliac, N., and  
595 Delort, A. M.: Potential impact of microbial activity on the oxidant capacity and organic carbon  
596 budget in clouds, Proc Natl Acad Sci U S A, 110, 559-564, 10.1073/pnas.1205743110, 2013.

597 Vaitilingom, M., Attard, E., Gaiani, N., Sancelme, M., Deguillaume, L., Flossmann, A. I.,

598 Amato, P., and Delort, A.-M.: Long-term features of cloud microbiology at the puy de Dôme  
599 (France), *Atmospheric Environment*, 56, 88-100,  
600 <https://doi.org/10.1016/j.atmosenv.2012.03.072>, 2012.

601 Väitilingom, M., Charbouillot, T., Deguillaume, L., Maisonobe, R., Parazols, M., Amato, P.,  
602 Sancelme, M., and Delort, A. M.: Atmospheric chemistry of carboxylic acids: microbial  
603 implication versus photochemistry, *Atmospheric Chemistry and Physics*, 11, 8721-8733,  
604 10.5194/acp-11-8721-2011, 2011.

605 Watson, J., Baker, T., and Bell, S.: *Molecular biology of the gene*, 6th edn. W, 2007.

606 Weast, R. C. and Astle, M. J.: *CRC Handbook of Chemistry and Physics*, CRC Press 1981.

607 Wei, M., Xu, C., Chen, J., Zhu, C., Li, J., and Lv, G.: Characteristics of bacterial community in  
608 cloud water at Mt Tai: similarity and disparity under polluted and non-polluted cloud episodes,  
609 *Atmos. Chem. Phys.*, 17, 5253-5270, <https://doi.org/10.5194/acp-17-5253-2017>, 2017.

610 pKa data compiled by R. Williams:  
611 [https://organicchemistrydata.org/hansreich/resources/pka/pka\\_data/pka-compilation-](https://organicchemistrydata.org/hansreich/resources/pka/pka_data/pka-compilation-williams.pdf)  
612 [williams.pdf](https://organicchemistrydata.org/hansreich/resources/pka/pka_data/pka-compilation-williams.pdf), last access: 7 Dec 2022.

613 Xu, G., Lee, X., and Lv, Y.: Urban and rural observations of carboxylic acids in rainwater in  
614 Southwest of China: the impact of urbanization, *Journal of atmospheric chemistry*, 62, 249-  
615 260, <https://doi.org/10.1007/s10874-010-9151-4>, 2009.

616 Zhang, M., Khaled, A., Amato, P., Delort, A. M., and Ervens, B.: Sensitivities to biological  
617 aerosol particle properties and ageing processes: potential implications for aerosol–cloud  
618 interactions and optical properties, *Atmos. Chem. Phys.*, 21, 3699-3724,  
619 <https://doi.org/10.5194/acp-21-3699-2021>, 2021.

620 Zhang, Y., Lee, X., and Cao, F.: Chemical characteristics and sources of organic acids in  
621 precipitation at a semi-urban site in Southwest China, *Atmospheric environment*, 45, 413-419,  
622 <https://doi.org/10.1016/j.atmosenv.2010.09.067>, 2011.

623 Zhao, W., Wang, Z., Li, S., Li, L., Wei, L., Xie, Q., Yue, S., Li, T., Liang, Y., and Sun, Y.: Water-  
624 soluble low molecular weight organics in cloud water at Mt. Tai Mo Shan, Hong Kong, *Science*  
625 *of the Total Environment*, 697, 134095, <https://doi.org/10.1016/j.scitotenv.2019.134095>, 2019.

626 Zhou, H., Wang, X., Li, Z., Kuang, Y., Mao, D., and Luo, Y.: Occurrence and Distribution of  
627 Urban Dust-Associated Bacterial Antibiotic Resistance in Northern China, *Environmental*  
628 *Science & Technology Letters*, 5, 50-55, <https://doi.org/10.1021/acs.estlett.7b00571>, 2018.

629 Zhu, C., Chen, J., Wang, X., Li, J., Wei, M., Xu, C., Xu, X., Ding, A., and Collett, J. L.:  
630 Chemical Composition and Bacterial Community in Size-Resolved Cloud Water at the Summit  
631 of Mt. Tai, China, *Aerosol and Air Quality Research*, 18, 1-14,  
632 <https://doi.org/10.4209/aaqr.2016.11.0493>, 2018.

633
